# Supplementary material for: Investigating smart city adoption from the citizen’s insights: empirical evidence from the Jordan context
Source: PeerJ journal article supplement (doi:10.7717/peerj-cs.1289), 2023-03-20

# عمان كمدينة ذكية

The survey will take approximately 4 minutes to complete.

**توضيح:** نقوم في هذا البحث على دراسة العوامل التي قد تعيق تطوير العاصمة عمان كمدينة ذكية قائمة كل مرافقها على الانترنت وتكنولوجيا المعلومات بما في ذلك المنشآت الحكومية والتعليمية والخدماتية والصحية.

**مفهوم المدينة الذكية:** وفقاً للاتحاد الدولي للاتصالات هي مدينة مبتكرة تستخدم تكنولوجيا المعلومات والاتصالات لتحسين نوعية الحياة، وكفاءة العمليات والخدمات الحضرية، والقدرة على المنافسة، وتلبي في الوقت ذاته احتياجات الأجيال الحالية والقادمة فيما يتعلق بالجوانب الاقتصادية والاجتماعية والبيئية، والثقافية.

ويمكن القول أنها مدن تستخدم خرائط رقمية توفر معلومات في الوقت الحقيقي عن حالة أحياء ومؤسسات ومجمعات محددة، إضافة إلى المجال الجوي والبحري والبري للمدينة، إضافة إلى أتمتة الكثير من المعاملات اليدوية وتحويلها إلى الكترونية يمكن تنفيذها من خلال الأجهزة الذكية كالهواتف والحواسيب.. وإتاحة كل هذه المعلومات في وقتها الحقيقي للمديرين والشرطة والمواطنين والدوائر الحكومية التعليمية والخدماتية والصحية، يمكن لأي شخص إنجاز الكثير من المعاملات الكترونياً أو معرفة وجود الحافلات ومناطق الازدحام واستهلاك الطاقة وجودة الهواء وغيرها من الخدمات، إضافة إلى تسهيل أعمال الخدمات الصحية وأصحاب البقالة والمتاجر وخبراء التسويق والمعلمين والأخصائيين الاجتماعيين وغيرهم الكثير من الموظفين في أداء أعمالهم بناء على معلومات لحظية.. ويمكن اعتبار تطبيق خرائط جوجل مثال بسيط على التطبيقات التي ستكون متاحة في المدينة الذكية.

**تعهد:** المعلومات والردود التي يتم جمعها خاصة تماماً. نحن لا نشارك هذه الردود الفردية مع أي جهة ويتم استخدامها فقط للأغراض المتعلقة بتقديم وتحسين البحث العلمي.

## القائمون على البحث:

د. منير نصير، جامعة الأمير سطاتم بن عبدالعزيز  
د. محمد الشبعة، جامعة آل البيت

## المعلومات الشخصية: Personal Information:

### 1. Gender: الجنس

أنثى

ذكر

**2. Age: العمر**

- 18-25
- 26-35
- 36-45
- 46-50
- أكبر من 50 سنة

**3. Highest education level: المستوى الدراسي**

- ثانوية عامة فما دون
- دبلوم
- بكالوريوس
- دراسات عليا
- Other

**4. information and communication technology (ICT) experience: الخبرة في استخدام تكنولوجيا المعلومات**

- ضعيف
- مقبول
- جيد
- جيد جداً
- ممتاز

## 5. The monthly income: الدخل الشهري

- أقل من 500 دينار
- 500-700 دينار
- 700-1000 دينار
- أكثر من 1000 دينار

## Amman Smart City: عمان كمدينة ذكية

### 6. Perceived Usefulness and Enjoyment الفائدة المرجوة من المدينة الذكية

|                                                                                                                                | Strongly Disagree<br>بشدة لا أتفق | Disagree لا أتفق      | Neutral<br>محايد      | Agree أتفق            | Strongly Agree<br>أتفق بشدة |
|--------------------------------------------------------------------------------------------------------------------------------|-----------------------------------|-----------------------|-----------------------|-----------------------|-----------------------------|
| Amman smart city increases my productivity<br>ترفع المدينة الذكية في عمان من قدرتي الانتاجية                                   | <input type="radio"/>             | <input type="radio"/> | <input type="radio"/> | <input type="radio"/> | <input type="radio"/>       |
| Amman smart city allows me to improve my work performance and quality.<br>تتيح لي المدينة الذكية في عمان تطوير أداء وجودة عملي | <input type="radio"/>             | <input type="radio"/> | <input type="radio"/> | <input type="radio"/> | <input type="radio"/>       |
| Amman smart city saves me time.<br>تسهم المدينة الذكية في عمان على الحفاظ على وقتي                                             | <input type="radio"/>             | <input type="radio"/> | <input type="radio"/> | <input type="radio"/> | <input type="radio"/>       |
| Overall, I would find Amman smart city to be advantageous.<br>بشكل عام                                                         | Strongly Disagree<br>بشدة لا أتفق | Disagree لا أتفق      | Neutral<br>محايد      | Agree أتفق            | Strongly Agree<br>أتفق بشدة |

ارى ان تطوير  
عمّان كمدينة  
ذكية سيكون  
مفيداً.

## 7. Perceived Ease of Use سهولة استخدام المدينة الذكية

|                                                                                                                                              | Strongly<br>Disagree<br>بشدة لا أتفق | Disagree لا<br>أتفق   | Neutral<br>محايد      | Agree أتفق            | Strongly<br>Agree<br>بشدة |
|----------------------------------------------------------------------------------------------------------------------------------------------|--------------------------------------|-----------------------|-----------------------|-----------------------|---------------------------|
| My interaction with smart city is clear and understandable. تفاعلي مع المدينة الذكية سيكون محدداً ومفهوماً وواضحاً                           | <input type="radio"/>                | <input type="radio"/> | <input type="radio"/> | <input type="radio"/> | <input type="radio"/>     |
| Learning to operate smart city and following the guidance is easy to me. تعلم استخدام المدينة الذكية واتباع تعليماتها سيكون سهلاً بالنسبة لي | <input type="radio"/>                | <input type="radio"/> | <input type="radio"/> | <input type="radio"/> | <input type="radio"/>     |
| It is easy and quick for me to become skillful at using smart city. أعتقد سأستطيع امتلاك مهارات التعامل مع المدينة الذكية بسرعة وسهولة.      | <input type="radio"/>                | <input type="radio"/> | <input type="radio"/> | <input type="radio"/> | <input type="radio"/>     |
|                                                                                                                                              | Strongly<br>Disagree<br>بشدة لا أتفق | Disagree لا<br>أتفق   | Neutral<br>محايد      | Agree أتفق            | Strongly<br>Agree<br>بشدة |

I think smart city will be user friendly and easy to use. أعتقد أن المدينة الذكية ستكون صديقة وسهلة الاستخدام بالنسبة للمستخدمين.

    

Overall, I think the smart city is easy to get to do what I wanted to do. بشكل عام أعتقد أن المدينة الذكية ستعمل على تسهيل تنفيذ الأعمال التي أريد القيام بها.

    

## 8. Security and privacy أمان وسرية المستخدمين

Strongly Disagree بشدة لا أتفق  
Disagree لا أتفق  
Neutral محايد  
Agree أتفق  
Strongly Agree أتفق بشدة

I think my information is not disclosed to unwanted authorities or personals. أعتقد أن بياناتي التي أستخدمها ضمن المدينة الذكية لن تكون متاحة لأي سلطات أو جهات لا أربغ باطلاعهم

    

Strongly Disagree بشدة لا أتفق  
Disagree لا أتفق  
Neutral محايد  
Agree أتفق  
Strongly Agree أتفق بشدة

عليها.

I think my  
confidentialiti  
es of  
information  
remains  
protected.

أعتقد أن سرية  
المعلومات  
الخاصة بي  
تبقى محمية.

    

I think the  
security  
aspect of the  
IT-enabled  
system is not  
compromised  
under any  
circumstance

أعتقد أن  
جانب السرية  
للمدينة الذكية  
لن يتم  
المساس به  
تحت أي  
ظروف.

    

Users are  
adequately  
trained and  
aware of how  
to use the IT  
enabled  
services  
safely and  
securely.

أعتقد أنه سيتم  
تدريب  
المواطنين  
بشكل كافي  
بكيفية استخدام  
خدمات المدينة  
الذكية بشكل  
آمن وسري.

    

Overall, I  
would find  
the IT-  
enabled  
services of

Strongly  
Disagree  
بشدة لا أتفق

Disagree لا  
أتفق

Neutral  
محايد

أتفق Agree

Strongly  
Agree أتفق  
بشدة

smart city are  
having a high  
degree of  
security  
features  
which can  
keep the  
digital  
services fully  
secured.

بشكل عام،  
أعتقد أن  
خدمات المدينة  
الذكية سوف  
تتمتع بدرجة  
عالية من الأمان  
والسرية التي  
تضمن لي  
خدمة سرية  
وأمنة بالكامل.

    

## 9. ICT Infrastructure and Inadequate Internet connectivity البنية التحتية

Strongly Disagree بشدة لا أتفق  
Disagree لا أتفق  
Neutral محايد  
Agree أتفق  
Strongly Agree أتفق بشدة

I think the  
smart city  
services are  
efficient and  
user friendly  
to the  
residents of  
smart city.

أعتقد أن  
خدمات المدينة  
الذكية في  
عمان سوف  
تتسم بالكفاءة  
وسهولة  
الاستخدام  
لسكان المدينة  
الذكية.

    

I think the  
functionalities  
will be

Strongly Disagree بشدة لا أتفق  
Disagree لا أتفق  
Neutral محايد  
Agree أتفق  
Strongly Agree أتفق بشدة



adequately  
designed to  
meet the  
needs of the  
users with full  
satisfaction.  
أعتقد أن  
وظائف المدينة  
الذكية سيتم  
تصميمها  
بشكل يلبي  
متطلبات  
المواطنين  
وينال رضاهم.

    

I think the  
smart city  
systems are  
well  
maintained  
providing  
good-quality  
services  
to the users.  
أعتقد أن أنظمة  
المدينة الذكية  
ستحافظ على  
استمرارية  
توفير خدمة  
عالية الجودة  
للمواطنين.

    

I think the  
information  
will be  
continuously  
updated with  
latest  
information  
in place. أعتقد  
أن معلومات  
المدينة الذكية  
سيتم تحديثها  
باستمرار بأخر  
المعلومات  
على أرض  
الواقع.

    

Overall, I  
think the  
system is  
reliable and it  
maintains the

Strongly  
Disagree  
بشدة لا أتفق

Disagree لا  
أتفق

Neutral  
محايد

Agree أتفق

Strongly  
Agree أتفق  
بشدة

performance  
as per the  
requirements.  
بشكل عام،  
أعتقد أن  
المدينة الذكية  
ستكون موثوقة  
وتحافظ على  
أداءها وفق  
المتطلبات.

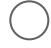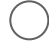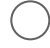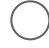

## 10. Social Influence التأثير الاجتماعي

|                                                                                                                                                                                        | Strongly Disagree<br>بشدة لا أتفق | Disagree لا أتفق      | Neutral<br>محايد      | Agree أتفق            | Strongly Agree<br>أتفق بشدة |
|----------------------------------------------------------------------------------------------------------------------------------------------------------------------------------------|-----------------------------------|-----------------------|-----------------------|-----------------------|-----------------------------|
| I think that friends and family members will influence my decision to use smart city. أعتقد أن الأصدقاء وأفراد العائلة سيؤثرون على قراري باستخدام المدينة الذكية.                      | <input type="radio"/>             | <input type="radio"/> | <input type="radio"/> | <input type="radio"/> | <input type="radio"/>       |
| Mass media (e.g.: TV, radio and newspaper) will influence my decisions in using smart city. ستؤثر وسائل الإعلام (مثل التلفزيون والراديو والصحف) على قراراتي في استخدام المدينة الذكية. | <input type="radio"/>             | <input type="radio"/> | <input type="radio"/> | <input type="radio"/> | <input type="radio"/>       |
| Overall, I will use smart city if my colleagues use it. بشكل عام ، سأستخدم المدينة الذكية إذا استخدمها زملائي.                                                                         | <input type="radio"/>             | <input type="radio"/> | <input type="radio"/> | <input type="radio"/> | <input type="radio"/>       |

## 11. Behavioral Intention احتمالية استخدام المدينة الذكية

|                                                                                                                                                       | Strongly Disagree<br>بشدة لا أتفق | Disagree لا أتفق      | Neutral محايد         | Agree أتفق            | Strongly Agree<br>أتفق بشدة |
|-------------------------------------------------------------------------------------------------------------------------------------------------------|-----------------------------------|-----------------------|-----------------------|-----------------------|-----------------------------|
| I will use the smart city once adopted. سأستخدم المدينة الذكية بمجرد اعتمادها.                                                                        | <input type="radio"/>             | <input type="radio"/> | <input type="radio"/> | <input type="radio"/> | <input type="radio"/>       |
| I will purchase smart city enabled phones once adopted, سأشتري الهواتف التي تدعم المدينة الذكية بمجرد تطبيقها،                                        | <input type="radio"/>             | <input type="radio"/> | <input type="radio"/> | <input type="radio"/> | <input type="radio"/>       |
| I predict that I will continue to use the smart city applications on a regular basis. أتوقع أنني سأستمر في استخدام تطبيقات المدينة الذكية بشكل منتظم. | <input type="radio"/>             | <input type="radio"/> | <input type="radio"/> | <input type="radio"/> | <input type="radio"/>       |

12. شكراً جزيلاً على مساهمتك في هذا الجهد العلمي، يمكنك هنا إضافة أي تعليق أو ملاحظة

---

This content is neither created nor endorsed by Microsoft. The data you submit will be sent to the form owner.

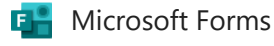

Supplement: Survey.pdf [file Survey.pdf]
