# Supplementary material for: Investigating smart city adoption from the citizen’s insights: empirical evidence from the Jordan context
Source: PeerJ Comput Sci. 2023 Mar 20;9:e1289. doi: 10.7717/peerj-cs.1289 (PMC10280567; doi:10.7717/peerj-cs.1289)
Supplement: Supplemental Information 1 [file peerj-cs-09-1289-s001.xlsx]

## Sheet:  Sheet1
ID	Start time	Completion time	Email	Name	Gender	Age	Highest education level	information and communication technology (ICT) experience	The monthly income	Amman smart city increases my productivity	Amman smart city allows me to improve my work performance and quality.	Amman's smart city saves me time.	Overall, I would find Amman smart city to be advantageous.	My interaction with smart city is clear and understandable.	Learning to operate smart city and following the guidance is easy to me.	It is easy and quick for me to become skillful at using smart city.	I think smart city will be user friendly and easy to use.	Overall, I think the smart city is easy to get to do what I wanted to do.	I think my information is not disclosed to unwanted authorities or personals.	I think my confidentialities of information remains protected.	I think the security aspect of the IT-enabled system is not compromised under any circumstances.	Users are adequately trained and aware of how to use the IT enabled services safely and securely.	Overall, I would find the IT-enabled services of smart city are having a high degree of security features which can keep the digital services fully secured.	I think the smart city services are efficient and user friendly to the residents of smart city.	I think the functionalities will be adequately designed to meet the needs of the users with full satisfaction.	think the smart city systems are well maintained providing good-quality services to the users.	I think the information will be continuously updated with the latest information in place.	Overall, I think the system is reliable and it maintains the performance as per the requirements.	I think that friends and family members will influence my decision to use smart city.	Mass media (eg: TV, radio and newspaper) will influence my decisions in using smart city.	Overall, I will use smart city if my colleagues use it.	I will use the smart city once adopted.	I will purchase smart city enabled phones once adopted.	I predict that I will continue to use the smart city applications on a regular basis.	Notes	Column1
	2022-05-12 09:54:33	2022-05-12 10:07:35	anonymous	anonymous	M	36-45	BA	Good	More than 1000 dinars	Disagree	Agree	Agree	Strongly Agree	Agree	Agree	Agree	Agree	Agree	Disagree	Agree	Agree	Agree	Disagree	Agree	Agree	Agree	Disagree	Neutral	Agree	Strongly Agree	Neutral	Agree	Agree	Disagree		14
	2022-05-12 10:27:33	2022-05-12 10:30:10	anonymous	anonymous	M	36-45	Postgraduate	Very well	More than 1000 dinars	Strongly Agree	Strongly Agree	Strongly Agree	Strongly Agree	Agree	Agree	Agree	Agree	Agree	Agree	Agree	Agree	Agree	Agree	Agree	Agree	Agree	Agree	Agree	Agree	Agree	Agree	Agree	Agree	Agree
	2022-05-12 10:25:59	2022-05-12 10:32:13	anonymous	anonymous	M	36-45	BA	Very well	700-1000 dinars	Agree	Agree	Strongly Agree	Strongly Agree	Strongly Agree	Agree	Strongly Agree	Strongly Agree	Strongly Agree	Strongly Agree	Agree	Agree	Agree	Strongly Agree	Strongly Agree	Agree	Strongly Agree	Strongly Agree	Agree	Disagree	Agree	Neutral	Strongly Agree	Agree	Agree
	2022-05-12 10:40:46	2022-05-12 10:43:46	anonymous	anonymous	M	36-45	Postgraduate	excellent	More than 1000 dinars	Agree	Agree	Agree	Strongly Agree	Agree	Agree	Agree	Neutral	Agree	Neutral	Neutral	Neutral	Agree	Agree	Agree	Agree	Agree	Agree	Agree	Strongly Disagree	Disagree	Strongly Disagree	Agree	Agree	Agree	Thanks for all your efforts
	2022-05-12 10:40:57	2022-05-12 10:44:21	anonymous	anonymous	F	26-35	BA	Very well	Less than 500 dinars	Agree	Agree	Agree	Strongly Agree	Strongly Agree	Strongly Agree	Strongly Agree	Agree	Strongly Agree	Disagree	Agree	Disagree	Neutral	Disagree	Agree	Agree	Agree	Agree	Agree	Strongly Agree	Strongly Agree	Strongly Agree	Strongly Agree	Strongly Agree	Strongly Agree		6
	2022-05-12 10:46:55	2022-05-12 10:49:11	anonymous	anonymous	F	36-45	BA	Very well	500-700 dinars	Disagree	Agree	Agree	Agree	Agree	Agree	Agree	Neutral	Neutral	Neutral	Neutral	Neutral	Agree	Agree	Agree	Agree	Neutral	Agree	Agree	Agree	Strongly Disagree		Neutral	Agree	Agree
	2022-05-12 10:48:58	2022-05-12 10:50:56	anonymous	anonymous	M	36-45	Postgraduate	excellent	More than 1000 dinars	Neutral	Agree	Agree	Strongly Agree	Agree	Agree	Strongly Agree	Strongly Agree	Strongly Agree	Neutral	Strongly Agree	Agree	Disagree	Neutral	Disagree	Agree	Agree	Agree	Agree	Disagree	Agree	Agree	Agree	Agree	Strongly Agree
	2022-05-12 10:33:05	2022-05-12 10:52:19	anonymous	anonymous	F	26-35	BA	Very well	500-700 dinars	Neutral	Agree	Agree	Strongly Agree	Neutral	Strongly Agree	Strongly Agree	Agree	Agree	Neutral	Neutral	Neutral	Agree	Neutral	Neutral	Neutral	Agree	Neutral	Neutral		Disagree	Strongly Agree	Agree	Agree	Agree
	2022-05-12 10:56:47	2022-05-12 11:02:42	anonymous	anonymous	M	18-25	BA	Very well	Less than 500 dinars	Agree	Agree	Strongly Agree	Disagree	Neutral	Agree	Agree	Agree	Disagree	Disagree	Disagree	Strongly Disagree	Disagree	Disagree	Disagree	Neutral	Neutral	Neutral	Neutral	Disagree	Neutral	Disagree	Agree	Neutral	Neutral
	2022-05-12 10:50:06	2022-05-12 11:02:45	anonymous	anonymous	M	36-45	BA	excellent	More than 1000 dinars	Strongly Agree	Agree	Agree	Strongly Agree	Agree	Agree	Agree	Disagree	Agree	Strongly Disagree	Disagree	Disagree	Disagree	Disagree	Neutral	Agree	Agree	Agree	Neutral	Disagree	Agree	Neutral	Neutral	Neutral	Neutral	Thank you very much for your contribution to this scientific effort.
	2022-05-12 11:11:24	2022-05-12 11:13:01	anonymous	anonymous	M	36-45	BA	Good	500-700 dinars	Neutral	Agree	Agree	Agree	Neutral	Agree	Agree	Disagree	Agree	Neutral	Disagree	Neutral	Agree	Agree	Neutral	Agree	Disagree	Disagree	Agree	Disagree	Disagree	Disagree	Neutral	Neutral	Neutral		18
	2022-05-12 11:13:59	2022-05-12 11:17:52	anonymous	anonymous	M	36-45	BA	excellent	More than 1000 dinars	Agree	Agree	Strongly Agree	Strongly Agree	Strongly Agree	Strongly Agree	Strongly Agree	Agree	Strongly Agree	Agree	Agree	Neutral	Disagree	Neutral	Neutral	Agree	Strongly Agree	Neutral	Agree	Disagree	Disagree	Disagree	Strongly Agree	Strongly Agree	Strongly Agree
	2022-05-12 11:22:51	2022-05-12 11:26:53	anonymous	anonymous	M	18-25	BA	Very well	Less than 500 dinars	Agree	Agree	Strongly Agree	Strongly Agree	Strongly Agree	Agree	Agree	Strongly Agree	Strongly Agree	Neutral	Strongly Agree	Strongly Agree	Agree	Strongly Agree	Neutral	Agree	Agree	Agree	Neutral	Disagree	Neutral	Agree	Strongly Agree	Strongly Agree	Agree
	2022-05-12 11:33:53	2022-05-12 11:35:25	anonymous	anonymous	F	36-45	Postgraduate	Good	500-700 dinars	Agree	Agree	Agree	Agree	Agree	Agree	Agree	Agree	Agree	Agree	Disagree	Agree	Agree	Disagree	Agree	Agree	Agree	Agree	Agree	Agree	Agree	Agree	Agree	Agree	Agree
	2022-05-12 12:00:35	2022-05-12 12:01:49	anonymous	anonymous	M	26-35	BA	Acceptable	Less than 500 dinars	Neutral	Agree	Agree	Agree	Agree	Agree	Agree	Agree	Agree	Agree	Neutral	Agree	Disagree	Agree	Agree	Neutral	Agree	Agree	Agree	Agree	Agree	Agree	Agree	Agree	Agree		19
	2022-05-12 12:05:40	2022-05-12 12:11:23	anonymous	anonymous	M	36-45	Postgraduate	excellent	More than 1000 dinars	Strongly Agree	Agree	Agree	Strongly Agree	Agree	Agree	Strongly Agree	Strongly Agree	Strongly Agree	Strongly Agree	Agree	Agree	Strongly Agree	Agree	Agree	Agree	Agree	Disagree	Disagree	Strongly Agree	Strongly Agree	Strongly Agree	Strongly Agree	Strongly Agree	Strongly Agree
	2022-05-12 11:57:16	2022-05-12 12:16:04	anonymous	anonymous	M	36-45	Postgraduate	Very well	More than 1000 dinars	Agree	Agree	Strongly Agree	Strongly Agree	Agree	Agree	Agree	Agree	Agree	Neutral	Agree	Agree	Agree	Agree	Agree	Strongly Agree	Strongly Agree	Agree	Strongly Agree	Disagree	Agree	Agree	Agree	Agree	Agree
	2022-05-12 12:18:43	2022-05-12 12:24:08	anonymous	anonymous	M	36-45	Postgraduate	Very well	700-1000 dinars	Neutral	Neutral	Agree	Agree	Disagree	Agree	Agree	Disagree	Agree	Neutral	Neutral	Neutral	Disagree	Disagree	Disagree	Disagree	Disagree	Disagree	Disagree	Disagree	Disagree	Neutral	Disagree	Disagree	Neutral	Peace, mercy and blessings of God be upon you.. If the concept of a smart city was clarified before the questionnaire was submitted.. so that people could answer the questionnaire more objectively.. Also, my answer was affected through my previous experience with e-government applications.. because I find it ineffective.
	2022-05-12 12:33:50	2022-05-12 12:37:47	anonymous	anonymous	M	36-45	BA	Good	700-1000 dinars	Agree	Agree	Strongly Agree	Strongly Agree	Agree	Agree	Agree	Agree	Strongly Agree	Agree	Agree	Agree	Agree	Strongly Agree	Agree	Agree	Agree	Agree	Agree	Disagree	Neutral	Agree	Agree	Agree	Agree
	2022-05-12 13:02:38	2022-05-12 13:07:58	anonymous	anonymous	M	46-50	BA	Good	Less than 500 dinars	Neutral	Neutral	Agree	Disagree	Agree	Strongly Agree	Agree	Neutral	Neutral	Disagree	Strongly Disagree	Strongly Disagree	Disagree	Strongly Disagree	Neutral	Strongly Disagree	Neutral	Neutral	Disagree	Disagree	Neutral	Agree	Neutral	Neutral	Neutral
	2022-05-12 14:05:36	2022-05-12 14:09:25	anonymous	anonymous	M	36-45	BA	Very well	700-1000 dinars	Agree	Agree	Agree	Agree	Neutral	Agree	Neutral	Neutral	Agree	Neutral	Neutral	Neutral	Neutral	Neutral	Neutral	Agree	Agree	Neutral	Agree	Agree	Disagree	Agree	Agree	Neutral	Agree		11
	2022-05-12 14:07:09	2022-05-12 14:11:18	anonymous	anonymous	M	18-25	BA	excellent	Less than 500 dinars	Agree	Agree	Agree	Agree	Agree	Agree	Agree	Agree	Agree	Agree	Agree	Agree	Agree	Agree	Agree	Agree	Agree	Agree	Agree	Disagree	Disagree	Strongly Disagree	Agree	Agree	Agree
	2022-05-12 14:13:26	2022-05-12 14:15:42	anonymous	anonymous	M	Over 50 years old	Postgraduate	Good	More than 1000 dinars	Agree	Agree	Agree	Neutral	Agree	Agree	Neutral	Neutral	Agree	Disagree	Disagree	Agree	Neutral	Neutral	Disagree	Agree	Agree	Agree		Disagree	Agree	Agree	Strongly Agree	Agree	Agree
	2022-05-12 14:43:09	2022-05-12 14:47:53	anonymous	anonymous	M	26-35	Postgraduate	Good	700-1000 dinars	Strongly Agree	Strongly Agree	Strongly Agree	Strongly Agree	Strongly Agree	Strongly Agree	Strongly Agree	Disagree	Strongly Agree	Strongly Disagree	Strongly Disagree	Disagree	Neutral	Strongly Disagree	Strongly Agree	Agree	Strongly Agree	Agree	Neutral	Strongly Disagree	Strongly Disagree	Strongly Disagree	Strongly Agree	Strongly Agree	Strongly Agree
	2022-05-12 14:44:24	2022-05-12 14:56:53	anonymous	anonymous	M	Over 50 years old	Postgraduate	Very well	More than 1000 dinars	Neutral	Neutral	Agree	Agree	Neutral	Agree	Agree	Neutral	Neutral	Neutral	Neutral	Disagree	Neutral	Neutral	Neutral	Neutral	Neutral	Neutral	Neutral	Disagree	Agree	Agree	Agree	Neutral	Agree	There are questions related to confidentiality that need to be reviewed, especially as they are related to information security, in addition to the title of the tool and the concept of what came in the first force
	2022-05-12 15:14:05	2022-05-12 15:18:05	anonymous	anonymous	M	36-45	Postgraduate	excellent	More than 1000 dinars	Agree	Agree	Agree	Agree	Agree	Agree	Agree	Neutral	Agree	Disagree	Disagree	Disagree	Neutral	Agree	Neutral	Neutral	Agree	Neutral	Agree	Disagree	Neutral	Disagree	Agree	Disagree	Agree
	2022-05-12 16:07:07	2022-05-12 16:09:49	anonymous	anonymous	M	18-25	BA	excellent	Less than 500 dinars	Agree	Agree	Neutral	Strongly Agree	Strongly Agree	Strongly Agree	Strongly Agree	Agree	Strongly Agree	Disagree	Disagree	Disagree	Neutral	Neutral	Agree	Agree	Agree	Agree	Neutral	Disagree	Disagree	Neutral	Agree	Agree	Agree
	2022-05-12 16:19:48	2022-05-12 16:22:36	anonymous	anonymous	M	26-35	BA	Good	More than 1000 dinars	Agree	Agree	Agree	Agree	Disagree	Agree	Agree	Agree	Agree	Agree	Agree	Agree	Agree	Agree	Agree	Agree	Agree	Agree	Agree	Agree	Agree	Agree	Agree	Agree	Agree	Good project, but hopefully it will be implemented
	2022-05-12 16:24:24	2022-05-12 16:27:48	anonymous	anonymous	M	18-25	BA	Acceptable	Less than 500 dinars	Agree	Neutral	Neutral	Agree	Neutral	Disagree	Agree	Neutral	Disagree	Disagree	Disagree	Disagree	Neutral	Neutral	Neutral	Neutral	Neutral	Neutral	Neutral	Neutral	Neutral	Neutral	Neutral	Neutral	Neutral
	2022-05-12 17:10:12	2022-05-12 17:17:32	anonymous	anonymous	M	Over 50 years old	BA	Good	Less than 500 dinars	Agree	Agree	Agree	Strongly Agree	Neutral	Disagree	Agree	Agree	Agree	Disagree	Strongly Agree	Neutral	Neutral	Strongly Agree	Neutral	Strongly Agree	Agree	Strongly Agree	Disagree	Strongly Disagree	Strongly Disagree	Disagree	Strongly Agree	Agree	Neutral
	2022-05-12 17:42:28	2022-05-12 17:47:51	anonymous	anonymous	M	18-25	BA	Very well	700-1000 dinars	Strongly Disagree	Strongly Disagree	Strongly Disagree	Agree	Agree	Agree	Agree	Agree	Neutral	Disagree	Neutral	Agree	Agree	Agree	Agree	Neutral	Agree	Neutral	Neutral	Disagree	Disagree	Agree	Agree	Neutral	Agree
	2022-05-12 19:00:29	2022-05-12 19:06:04	anonymous	anonymous	M	18-25	BA	excellent	500-700 dinars	Disagree	Disagree	Strongly Disagree	Strongly Agree	Agree	Strongly Agree	Agree	Neutral	Strongly Agree	Strongly Disagree	Neutral	Agree	Disagree	Neutral	Agree	Neutral	Neutral	Disagree	Neutral	Neutral	Strongly Disagree	Disagree	Agree	Agree	Agree
	2022-05-12 19:23:10	2022-05-12 19:30:25	anonymous	anonymous	M	36-45	Postgraduate	Very well	More than 1000 dinars	Strongly Agree	Neutral	Strongly Agree	Strongly Agree	Agree	Agree	Agree	Neutral	Agree	Neutral	Disagree	Disagree	Strongly Disagree	Disagree	Neutral	Neutral	Neutral	Agree	Agree	Disagree	Agree	Agree	Agree	Disagree	Disagree	The elderly and those who are not fluent in using modern technology should be considered when introducing a smart city project. I think it is good to keep the current services and add smart city services to preserve the opportunities for all segments to access services in the way they are good at dealing with and prefer.
	2022-05-12 19:53:16	2022-05-12 19:54:54	anonymous	anonymous	F	26-35	BA	Good	Less than 500 dinars	Agree	Strongly Agree	Agree	Agree	Strongly Agree	Strongly Agree	Agree	Strongly Agree	Strongly Agree	Strongly Agree	Agree	Strongly Agree		Disagree	Agree	Strongly Disagree	Agree	Strongly Agree	Agree	Agree	Agree	Agree	Neutral	Agree	Agree		5
	2022-05-12 20:04:57	2022-05-12 20:07:02	anonymous	anonymous	F	18-25	BA	Acceptable	Less than 500 dinars	Agree	Agree	Agree	Agree	Agree	Agree	Agree	Agree	Agree	Agree	Agree	Agree	Agree	Agree	Agree	Agree	Agree	Agree	Agree	Agree	Agree	Agree	Agree	Agree	Agree
	2022-05-12 20:46:14	2022-05-12 21:04:46	anonymous	anonymous	M	36-45	BA	Very well	500-700 dinars	Strongly Agree	Agree	Strongly Agree	Strongly Agree	Agree	Strongly Agree	Agree	Agree	Strongly Agree	Neutral	Agree	Neutral	Agree	Neutral	Agree	Disagree	Agree	Agree	Agree	Agree	Agree	Disagree	Agree	Agree	Agree
	2022-05-12 22:15:36	2022-05-12 22:20:51	anonymous	anonymous	F	26-35	Postgraduate	Very well	500-700 dinars	Agree	Agree	Agree	Agree	Agree	Agree	Agree	Agree	Agree	Agree	Agree	Agree	Agree	Agree	Agree	Agree	Agree	Agree	Agree	Agree	Agree	Agree	Agree	Agree	Agree
	2022-05-12 23:02:28	2022-05-12 23:06:48	anonymous	anonymous	M	Over 50 years old	Postgraduate	Very well	More than 1000 dinars	Strongly Agree	Strongly Agree	Agree	Strongly Agree	Strongly Agree	Strongly Agree	Agree	Agree	Strongly Agree	Agree	Agree	Agree	Agree	Agree	Agree	Agree	Neutral	Agree	Agree	Agree	Agree	Agree	Agree	Agree	Agree	Excellent for most influential class in the near future	19
	2022-05-12 23:43:12	2022-05-12 23:45:44	anonymous	anonymous	F	18-25	BA	Good	500-700 dinars	Agree	Agree	Agree	Strongly Agree	Neutral	Agree	Agree	Agree	Agree	Agree	Agree	Strongly Agree	Agree	Agree	Agree	Agree	Agree	Agree	Agree	Agree	Agree	Agree	Agree	Agree	Agree
	2022-05-13 00:35:46	2022-05-13 00:37:48	anonymous	anonymous	M	26-35	BA	Very well	700-1000 dinars	Neutral	Agree	Disagree	Agree	Neutral	Agree	Agree	Agree	Agree	Agree	Agree	Agree	Agree	Agree	Strongly Agree	Agree	Agree	Agree	Agree	Agree	Agree	Agree	Agree	Agree	Agree
	2022-05-13 02:38:02	2022-05-13 02:42:14	anonymous	anonymous	F	18-25	BA	Acceptable	Less than 500 dinars	Disagree	Neutral	Neutral	Neutral	Agree	Agree	Agree	Agree	Agree	Strongly Disagree	Strongly Disagree	Neutral	Neutral	Neutral	Agree	Agree	Agree	Agree	Disagree	Neutral	Agree	Neutral	Agree	Neutral	Disagree
	2022-05-13 12:16:24	2022-05-13 12:18:21	anonymous	anonymous	M	36-45	Postgraduate	excellent	More than 1000 dinars	Agree	Agree	Agree	Agree	Agree	Neutral	Agree	Agree	Agree	Agree	Agree	Agree	Agree	Agree	Agree	Agree	Agree	Agree	Agree	Agree	Agree	Agree	Agree	Agree	Agree
	2022-05-13 12:14:32	2022-05-13 12:20:11	anonymous	anonymous	M	36-45	Postgraduate	excellent	More than 1000 dinars	Agree	Agree	Agree	Agree	Agree	Neutral	Neutral	Neutral	Agree	Agree	Strongly Disagree	Strongly Disagree	Strongly Disagree	Strongly Disagree	Disagree	Strongly Disagree	Strongly Disagree	Neutral	Agree	Agree	Agree	Strongly Agree	Agree	Agree	Neutral	The confidentiality of information is a fantasy in our society
	2022-05-13 14:05:12	2022-05-13 14:07:10	anonymous	anonymous	M	Over 50 years old	Postgraduate	excellent	More than 1000 dinars	Strongly Agree	Strongly Agree	Strongly Agree	Strongly Agree	Strongly Agree	Strongly Agree	Strongly Agree	Strongly Agree	Strongly Agree	Agree	Strongly Agree	Strongly Agree	Strongly Agree	Agree	Agree	Strongly Agree	Strongly Agree	Agree	Strongly Agree	Agree	Strongly Agree	Strongly Agree	Agree	Strongly Agree	Agree	No
	2022-05-13 14:13:48	2022-05-13 14:15:32	anonymous	anonymous	M	46-50	Postgraduate	Very well	More than 1000 dinars	Agree	Agree	Neutral	Agree	Neutral	Agree	Agree	Agree	Agree	Neutral	Agree	Agree	Neutral	Neutral	Disagree	Neutral	Agree	Strongly Agree	Agree	Neutral	Neutral	Agree	Strongly Disagree	Agree	Agree
	2022-05-13 14:24:34	2022-05-13 14:27:12	anonymous	anonymous	M	36-45	Postgraduate	Very well	More than 1000 dinars	Agree	Agree	Agree	Agree	Neutral	Agree	Agree	Neutral	Agree	Neutral	Agree	Agree	Agree	Neutral	Agree	Agree	Agree	Agree	Agree	Agree	Agree	Agree	Agree	Agree	Agree
	2022-05-13 15:49:25	2022-05-13 15:55:47	anonymous	anonymous	M	36-45	Postgraduate	excellent	Less than 500 dinars	Agree	Agree	Agree	Agree	Agree	Strongly Agree	Strongly Agree	Strongly Agree	Strongly Agree	Strongly Agree	Agree	Neutral	Agree	Agree	Agree	Agree	Agree	Agree	Agree	Neutral	Neutral	Agree	Agree	Agree	Agree
	2022-05-13 16:46:50	2022-05-13 16:48:41	anonymous	anonymous	M	26-35	diploma	Good	500-700 dinars	Neutral	Agree	Agree	Agree	Neutral	Agree	Agree	Agree	Strongly Agree	Agree	Disagree	Agree	Neutral	Strongly Agree	Neutral	Agree	Strongly Agree	Strongly Agree	Strongly Agree	Agree	Neutral	Disagree	Disagree	Agree	Neutral
	2022-05-13 16:47:51	2022-05-13 16:55:12	anonymous	anonymous	M	36-45	Postgraduate	Very well	More than 1000 dinars	Agree	Agree	Agree	Agree	Agree	Neutral	Agree	Disagree	Agree	Strongly Disagree	Disagree	Strongly Disagree	Disagree	Disagree	Agree	Neutral	Agree	Agree	Agree	Disagree	Agree	Agree	Agree	Disagree	Neutral
	2022-05-13 18:27:32	2022-05-13 18:32:31	anonymous	anonymous	M	36-45	BA	Very well	More than 1000 dinars	Agree	Agree	Strongly Agree	Agree	Agree	Agree	Agree	Agree	Strongly Agree	Neutral	Neutral	Neutral	Agree	Neutral	Agree	Agree	Neutral	Agree	Agree	Disagree	Neutral	Agree	Agree	Agree	Agree
	2022-05-13 20:43:11	2022-05-13 20:48:11	anonymous	anonymous	M	36-45	Postgraduate	excellent	More than 1000 dinars	Agree	Agree	Strongly Agree	Strongly Agree	Agree	Agree	Agree	Neutral	Strongly Agree	Neutral	Neutral	Neutral	Agree	Neutral	Agree	Agree	Agree	Neutral	Neutral	Disagree	Disagree	Disagree	Agree	Agree	Agree
	2022-05-13 20:47:10	2022-05-13 20:56:33	anonymous	anonymous	F	46-50	BA	excellent	700-1000 dinars	Agree	Agree	Strongly Agree	Agree	Strongly Agree	Agree	Agree	Strongly Agree	Strongly Agree	Neutral	Neutral	Neutral	Agree	Agree	Agree	Agree	Agree	Agree	Agree	Disagree	Agree	Disagree	Agree	Agree	Agree	The questionnaire needs further clarification at the outset.
	2022-05-13 21:05:30	2022-05-13 21:09:35	anonymous	anonymous	M	46-50	BA	Very well	500-700 dinars	Agree	Agree	Strongly Agree	Strongly Agree	Neutral	Neutral	Agree	Neutral	Agree	Neutral	Neutral	Neutral	Agree	Neutral	Agree	Strongly Disagree	Neutral	Agree	Agree	Strongly Disagree	Neutral	Neutral	Agree	Agree	Agree
	2022-05-13 21:08:23	2022-05-13 21:11:54	anonymous	anonymous	M	36-45	Postgraduate	Very well	500-700 dinars	Strongly Agree	Agree	Agree	Strongly Agree	Agree	Agree	Agree	Neutral	Agree	Agree	Agree	Agree	Neutral	Agree	Agree	Agree	Agree	Agree	Agree	Disagree	Agree	Agree	Agree	Agree	Agree
	2022-05-13 21:13:02	2022-05-13 21:16:57	anonymous	anonymous	F	26-35	BA	Very well	Less than 500 dinars	Neutral	Neutral	Agree	Agree	Neutral	Agree	Neutral	Neutral	Agree	Agree	Agree	Neutral	Neutral	Neutral	Neutral	Agree	Agree	Agree	Agree	Neutral	Strongly Agree	Agree	Agree	Neutral	Neutral
	2022-05-13 21:16:59	2022-05-13 21:21:24	anonymous	anonymous	F	36-45	diploma	excellent	Less than 500 dinars	Agree	Strongly Agree	Agree	Agree	Agree	Strongly Agree	Strongly Agree	Agree	Strongly Agree	Agree	Agree	Strongly Agree	Agree	Strongly Agree	Agree	Strongly Agree	Agree	Strongly Agree	Strongly Agree	Disagree	Disagree	Strongly Disagree	Strongly Agree	Neutral	Strongly Agree
	2022-05-13 21:15:16	2022-05-13 21:22:27	anonymous	anonymous	M	36-45	BA	Very well	500-700 dinars	Neutral	Neutral	Agree	Disagree	Neutral	Agree	Neutral	Disagree	Neutral	Disagree	Disagree	Disagree	Disagree	Disagree	Disagree	Disagree	Disagree	Neutral	Neutral	Agree	Agree	Neutral	Neutral	Disagree	Neutral	What is a smart city should be defined and clarified at the outset
	2022-05-13 21:28:59	2022-05-13 21:34:08	anonymous	anonymous	M	46-50	Postgraduate	excellent	More than 1000 dinars	Strongly Agree	Strongly Agree	Strongly Agree	Strongly Agree	Strongly Agree	Strongly Agree	Strongly Agree	Strongly Agree	Strongly Agree	Strongly Disagree	Strongly Disagree	Strongly Disagree	Strongly Disagree	Strongly Disagree	Strongly Agree	Strongly Agree	Strongly Agree	Strongly Agree	Strongly Agree	Strongly Agree	Strongly Agree	Strongly Agree	Strongly Agree	Strongly Agree	Strongly Agree
	2022-05-13 21:39:18	2022-05-13 21:42:57	anonymous	anonymous	F	36-45	BA	weak	700-1000 dinars	Agree	Neutral	Agree	Agree	Agree	Agree	Agree	Agree	Agree	Neutral	Neutral	Neutral	Agree	Agree	Agree	Agree	Agree	Agree	Agree	Agree	Agree	Neutral	Agree	Agree	Agree
	2022-05-13 22:11:04	2022-05-13 22:16:46	anonymous	anonymous	F	26-35	BA	Very well	500-700 dinars	Neutral	Neutral	Disagree	Disagree	Disagree	Agree	Agree	Disagree	Neutral	Strongly Disagree	Strongly Disagree	Strongly Disagree	Disagree	Strongly Disagree	Neutral	Neutral	Disagree	Strongly Disagree	Strongly Disagree	Neutral	Neutral	Agree	Agree	Agree	Agree
	2022-05-13 23:01:58	2022-05-13 23:05:53	anonymous	anonymous	F	26-35	Postgraduate	excellent	More than 1000 dinars	Agree	Agree	Agree	Agree	Agree	Agree	Agree	Neutral	Agree	Disagree	Disagree	Disagree	Neutral	Neutral	Agree	Neutral	Agree	Neutral	Neutral	Disagree	Disagree	Disagree	Neutral	Neutral	Agree
	2022-05-13 23:19:53	2022-05-13 23:23:29	anonymous	anonymous	F	36-45	Postgraduate	excellent	Less than 500 dinars	Strongly Agree	Agree	Agree	Agree	Agree	Agree	Agree	Agree	Agree	Agree	Neutral	Agree	Agree	Neutral	Agree	Neutral	Agree	Agree	Disagree	Agree	Agree	Disagree	Agree	Agree	Agree
	2022-05-13 23:22:42	2022-05-13 23:27:49	anonymous	anonymous	F	46-50	BA	excellent	500-700 dinars	Agree	Agree	Agree	Agree	Agree	Agree	Agree	Agree	Agree	Agree	Agree	Agree	Agree	Agree	Agree	Agree	Agree	Agree	Agree	Agree	Agree	Agree	Agree	Agree	Agree		5
	2022-05-13 23:24:30	2022-05-13 23:28:43	anonymous	anonymous	F	36-45	BA	Very well	500-700 dinars	Agree	Agree	Disagree	Agree	Agree	Disagree	Disagree	Neutral	Agree	Disagree	Disagree	Disagree	Agree	Disagree	Disagree	Neutral	Agree	Disagree	Agree	Agree	Agree	Agree	Agree	Agree	Disagree
	2022-05-13 23:46:28	2022-05-13 23:51:40	anonymous	anonymous	F	36-45	BA	Very well	More than 1000 dinars	Disagree	Neutral	Agree	Agree	Disagree	Neutral	Agree	Neutral	Neutral	Neutral	Neutral	Neutral	Neutral	Neutral	Agree	Neutral	Agree	Agree	Agree	Disagree	Disagree	Neutral	Agree	Neutral	Neutral	Please explain more about the meaning of the smart city
	2022-05-13 23:50:51	2022-05-13 23:56:41	anonymous	anonymous	F	Over 50 years old	Postgraduate	Good	More than 1000 dinars	Agree	Agree	Agree	Agree	Agree	Neutral	Neutral	Neutral	Agree	Neutral	Disagree	Neutral	Neutral	Neutral	Neutral	Neutral	Neutral	Neutral	Neutral	Agree	Neutral	Neutral	Neutral	Agree	Neutral
	2022-05-14 00:16:03	2022-05-14 00:20:15	anonymous	anonymous	M	36-45	BA	excellent	700-1000 dinars	Agree	Agree	Agree	Agree	Agree	Agree	Agree	Neutral	Agree	Agree	Neutral	Neutral	Disagree	Neutral	Neutral	Neutral	Neutral	Disagree	Disagree	Disagree	Disagree	Neutral	Agree	Disagree	Agree	As for the equipment for using the smart city.. The question is ambiguous in terms of whether the use of the smart city will require modern devices. If the answer is yes, I think that this will be a major obstacle to using the smart city.
	2022-05-14 02:22:46	2022-05-14 02:25:34	anonymous	anonymous	F	18-25	BA	Good	Less than 500 dinars	Neutral	Agree	Agree	Neutral	Agree	Disagree	Strongly Agree	Strongly Agree	Strongly Agree	Agree	Strongly Agree	Strongly Agree	Strongly Agree	Agree	Neutral	Strongly Agree	Agree	Strongly Agree	Strongly Agree	Disagree	Agree	Neutral	Agree	Agree	Strongly Agree	You started, thanks for your efforts
	2022-05-14 02:59:01	2022-05-14 03:02:23	anonymous	anonymous	F	26-35	Postgraduate	excellent	Less than 500 dinars	Strongly Agree	Strongly Agree	Strongly Agree	Strongly Agree	Strongly Agree	Agree	Strongly Agree	Strongly Agree	Strongly Agree	Agree	Agree	Agree	Neutral	Agree	Agree	Agree	Agree	Agree	Strongly Agree	Disagree	Disagree	Disagree	Strongly Agree	Strongly Agree	Strongly Agree
	2022-05-14 07:11:48	2022-05-14 07:16:05	anonymous	anonymous	F	26-35	BA	Very well	Less than 500 dinars	Agree	Strongly Agree	Strongly Agree	Agree	Strongly Agree	Strongly Agree	Strongly Agree	Strongly Agree	Strongly Agree	Strongly Agree	Strongly Agree	Strongly Agree	Strongly Agree	Strongly Agree	Strongly Agree	Strongly Agree	Strongly Agree	Strongly Agree	Strongly Agree	Strongly Agree	Strongly Agree	Strongly Agree	Strongly Agree	Strongly Agree	Strongly Agree
	2022-05-14 08:19:49	2022-05-14 08:24:12	anonymous	anonymous	F	26-35	BA	Very well	500-700 dinars	Agree	Agree	Agree	Agree	Agree	Agree	Agree	Agree	Agree	Agree	Agree	Agree	Agree	Agree	Agree	Agree	Agree	Agree	Neutral	Disagree	Disagree	Neutral	Agree	Neutral	Agree
	2022-05-14 09:31:56	2022-05-14 09:37:07	anonymous	anonymous	F	46-50	diploma	Very well	500-700 dinars	Neutral	Agree	Agree	Agree	Agree	Agree	Agree	Agree	Agree	Agree	Agree	Agree	Agree	Agree	Agree	Agree	Agree	Agree	Agree	Disagree	Disagree	Neutral	Agree	Agree	Agree
	2022-05-14 10:04:29	2022-05-14 10:11:10	anonymous	anonymous	F	26-35	BA	excellent	500-700 dinars	Neutral	Neutral	Neutral	Agree	Neutral	Agree	Agree	Agree	Agree	Neutral	Neutral	Neutral	Neutral	Neutral	Neutral	Neutral	Neutral	Neutral	Neutral	Agree	Neutral	Agree	Neutral	Neutral	Neutral
	2022-05-14 10:48:25	2022-05-14 10:57:22	anonymous	anonymous	F	Over 50 years old	diploma	Very well	500-700 dinars	Disagree	Disagree	Neutral	Neutral	Neutral	Neutral	Disagree	Neutral	Disagree	Neutral	Disagree	Agree	Disagree	Neutral	Disagree	Neutral	Neutral	Neutral	Disagree	Neutral	Agree	Agree	Neutral	Agree	Agree
	2022-05-14 11:25:26	2022-05-14 11:29:02	anonymous	anonymous	F	36-45	BA	Very well	700-1000 dinars	Agree	Agree	Agree	Agree	Agree	Agree	Agree	Disagree	Agree	Agree	Agree	Agree	Disagree	Agree	Agree	Agree	Agree	Agree	Agree	Agree	Agree	Agree	Agree	Agree	Neutral
	2022-05-14 12:12:03	2022-05-14 12:18:24	anonymous	anonymous	M	36-45	BA	Very well	500-700 dinars	Agree	Agree	Agree	Agree	Agree	Agree	Agree	Neutral	Agree	Disagree	Neutral	Neutral	Neutral	Neutral	Neutral	Neutral	Neutral	Agree	Neutral	Neutral	Neutral	Neutral	Agree	Strongly Disagree	Disagree
	2022-05-14 12:44:31	2022-05-14 12:48:49	anonymous	anonymous	M	36-45	Postgraduate	Very well	700-1000 dinars	Agree	Agree	Agree	Agree	Agree	Agree	Agree	Strongly Agree	Agree	Strongly Agree	Strongly Agree	Disagree	Disagree	Neutral	Neutral	Neutral	Agree	Agree	Agree	Agree	Disagree	Agree	Disagree	Disagree	Agree
	2022-05-14 17:04:39	2022-05-14 17:06:59	anonymous	anonymous	M	36-45	diploma	Very well	700-1000 dinars	Strongly Disagree	Neutral	Neutral	Disagree	Neutral	Agree	Strongly Agree	Agree	Strongly Disagree	Disagree	Strongly Agree	Neutral	Neutral	Strongly Agree	Agree	Strongly Disagree	Agree	Neutral	Strongly Agree	Disagree	Strongly Disagree	Agree	Disagree	Disagree	Neutral
	2022-05-15 01:18:04	2022-05-15 01:22:24	anonymous	anonymous	F	Over 50 years old	High school or less	Acceptable	Less than 500 dinars	Neutral	Neutral	Neutral	Neutral	Disagree	Neutral	Neutral	Neutral	Neutral	Neutral	Neutral	Neutral	Neutral	Neutral	Neutral	Neutral	Neutral	Neutral	Neutral	Neutral	Neutral	Neutral	Neutral	Neutral	Neutral
	2022-05-15 01:33:07	2022-05-15 01:45:52	anonymous	anonymous	F	18-25	diploma	Very well	Less than 500 dinars	Neutral	Agree	Agree	Agree	Agree	Agree	Agree	Agree	Agree	Agree	Agree	Neutral	Neutral	Agree	Agree	Agree	Agree	Agree	Neutral	Disagree	Disagree	Neutral	Agree	Agree	Agree
	2022-05-15 07:06:23	2022-05-15 07:14:39	anonymous	anonymous	F	Over 50 years old	Postgraduate	Very well	More than 1000 dinars	Strongly Agree	Strongly Agree	Strongly Agree	Strongly Agree	Agree	Agree	Strongly Agree	Agree	Strongly Agree	Disagree	Agree	Strongly Agree	Neutral	Disagree	Neutral	Agree	Strongly Agree	Agree	Agree	Strongly Disagree	Neutral	Agree	Strongly Agree	Agree	Strongly Agree
	2022-05-15 08:03:49	2022-05-15 08:08:27	anonymous	anonymous	F	Over 50 years old	BA	Very well	700-1000 dinars	Agree	Agree	Agree	Agree	Neutral	Agree	Agree	Agree	Agree	Disagree	Disagree	Disagree	Disagree	Disagree	Agree	Agree	Disagree	Disagree	Agree	Disagree	Agree	Neutral	Agree	Agree	Neutral
	2022-05-15 10:34:10	2022-05-15 10:38:07	anonymous	anonymous	M	46-50	Postgraduate	excellent	700-1000 dinars	Agree	Agree	Agree		Agree	Strongly Disagree	Strongly Disagree	Agree	Agree	Strongly Disagree	Strongly Disagree	Disagree	Disagree	Disagree	Agree	Disagree	Agree	Disagree	Disagree	Agree	Disagree	Strongly Disagree	Disagree	Strongly Disagree	Agree
	2022-05-15 19:58:39	2022-05-15 20:02:24	anonymous	anonymous	M	Over 50 years old	Postgraduate	Very well	More than 1000 dinars	Strongly Agree	Strongly Agree	Agree	Strongly Agree	Disagree	Agree	Agree	Agree	Agree	Disagree	Disagree	Disagree	Agree	Disagree	Agree	Agree	Strongly Agree	Agree	Agree	Disagree	Disagree	Neutral	Agree	Agree	Agree	Thanks so much
	2022-05-15 22:27:12	2022-05-15 22:31:08	anonymous	anonymous	M	26-35	BA	Very well	700-1000 dinars	Agree	Neutral	Agree	Strongly Agree	Agree	Agree	Strongly Agree	Agree	Strongly Agree	Disagree	Disagree	Neutral	Disagree	Neutral	Agree	Agree	Neutral	Agree	Agree	Agree	Neutral	Agree	Agree	Agree	Agree
	2022-05-17 12:50:42	2022-05-17 12:53:52	anonymous	anonymous	M	26-35	Postgraduate	Good	Less than 500 dinars	Neutral	Neutral	Neutral	Agree	Neutral	Agree	Agree	Neutral	Neutral	Disagree	Disagree	Disagree	Neutral	Disagree	Neutral	Disagree	Neutral	Neutral	Neutral	Neutral	Neutral	Neutral	Agree	Agree	Agree
	2022-05-19 23:51:47	2022-05-19 23:57:03	anonymous	anonymous	M	36-45	BA	Very well	More than 1000 dinars	Agree	Agree	Agree	Agree	Agree	Agree	Agree	Neutral	Agree	Neutral	Neutral	Neutral	Agree	Neutral	Neutral	Agree	Agree	Agree	Agree	Neutral	Neutral	Disagree	Agree	Neutral	Agree
	2022-05-20 09:28:09	2022-05-20 09:30:50	anonymous	anonymous	M	46-50	BA	excellent	More than 1000 dinars	Strongly Disagree	Disagree	Disagree	Agree	Agree	Strongly Agree	Strongly Agree	Strongly Agree	Strongly Agree	Neutral	Disagree	Disagree	Strongly Disagree	Strongly Disagree	Disagree	Neutral	Neutral	Disagree	Disagree	Agree	Agree	Agree	Strongly Agree	Strongly Agree	Strongly Agree
	2022-05-24 15:43:46	2022-05-24 15:49:47	anonymous	anonymous	F	26-35	High school or less	excellent	Less than 500 dinars	Neutral	Neutral	Strongly Agree	Strongly Agree	Strongly Agree	Strongly Agree	Strongly Agree	Strongly Agree	Strongly Agree	Strongly Disagree	Strongly Disagree	Disagree	Strongly Agree	Disagree	Strongly Agree	Strongly Agree	Strongly Agree	Strongly Agree	Strongly Agree	Strongly Agree	Strongly Agree	Strongly Agree	Strongly Agree	Agree	Strongly Agree
	2022-05-24 16:54:35	2022-05-24 16:56:08	anonymous	anonymous	F	26-35	BA	Very well	Less than 500 dinars	Strongly Disagree	Strongly Disagree	Strongly Disagree	Strongly Disagree	Strongly Disagree	Strongly Disagree	Strongly Disagree	Strongly Disagree	Strongly Disagree	Strongly Disagree	Strongly Disagree	Disagree	Neutral	Agree	Agree	Agree	Agree	Agree	Agree	Agree	Agree	Agree	Agree	Agree	Agree
	2022-05-24 17:06:11	2022-05-24 17:09:55	anonymous	anonymous	F	Over 50 years old	High school or less	Good	Less than 500 dinars	Disagree	Neutral	Agree	Agree	Neutral	Disagree	Agree	Strongly Disagree	Strongly Agree	Agree	Agree	Agree	Disagree	Disagree	Disagree	Disagree	Disagree	Neutral	Disagree	Disagree	Disagree	Neutral	Disagree	Neutral	Agree
	2022-05-24 21:39:22	2022-05-24 21:44:18	anonymous	anonymous	M	26-35	BA	Very well	700-1000 dinars	Strongly Agree	Strongly Agree	Strongly Agree	Strongly Agree	Agree	Strongly Agree	Strongly Agree	Agree	Strongly Agree	Agree	Agree	Agree	Agree	Agree	Agree	Agree	Agree	Agree	Agree	Disagree	Agree	Agree	Agree	Agree	Agree
	2022-05-24 21:57:19	2022-05-24 22:00:56	anonymous	anonymous	F	26-35	Postgraduate	excellent	More than 1000 dinars	Strongly Agree	Strongly Agree	Strongly Agree	Strongly Agree	Agree	Strongly Agree	Agree	Agree	Agree	Neutral	Neutral	Disagree	Disagree	Neutral	Agree	Agree	Agree	Disagree	Neutral	Disagree	Disagree	Neutral	Agree	Agree	Strongly Agree	I confirm and support the idea, but there is a reservation about the ability to keep the information confidential
	2022-05-24 22:05:37	2022-05-24 22:12:13	anonymous	anonymous	M	36-45	BA	Acceptable	Less than 500 dinars	Disagree	Agree	Agree	Agree	Agree	Agree	Agree	Agree	Disagree	Strongly Disagree	Disagree	Strongly Disagree	Strongly Disagree	Strongly Disagree	Neutral	Agree	Agree	Agree	Agree	Disagree	Disagree	Neutral	Agree	Agree	Agree
	2022-05-24 22:55:45	2022-05-24 22:59:03	anonymous	anonymous	F	26-35	BA	Acceptable	700-1000 dinars	Agree	Agree	Agree	Agree	Neutral	Agree	Disagree	Disagree	Agree	Neutral	Neutral	Agree	Disagree	Neutral	Agree	Agree	Agree	Agree	Agree	Neutral	Neutral	Agree	Neutral	Neutral	Agree		4
	2022-05-25 02:46:43	2022-05-25 02:49:36	anonymous	anonymous	F	36-45	Postgraduate	Very well	500-700 dinars	Agree	Agree	Agree	Strongly Agree	Agree	Agree	Agree	Agree	Agree	Agree	Agree	Agree	Agree	Agree	Agree	Agree	Agree	Agree	Agree	Agree	Agree	Agree	Agree	Agree	Agree
	2022-05-25 02:53:05	2022-05-25 02:58:08	anonymous	anonymous	F	26-35	BA	Very well	Less than 500 dinars	Agree	Agree	Agree	Agree	Agree	Agree	Agree	Agree	Agree	Agree	Agree	Agree	Agree	Agree	Agree	Agree	Agree	Agree	Agree	Disagree	Disagree	Disagree	Agree	Agree	Agree
	2022-05-25 06:28:08	2022-05-25 06:30:05	anonymous	anonymous	M	46-50	Postgraduate	Very well	700-1000 dinars	Strongly Agree	Agree	Agree	Agree	Agree	Agree	Agree	Agree	Neutral	Neutral	Neutral	Agree	Agree	Agree		Neutral	Agree	Agree	Agree	Neutral	Agree	Agree	Agree	Agree	Agree
	2022-05-25 11:17:44	2022-05-25 11:21:41	anonymous	anonymous	F	26-35	Postgraduate	Very well	500-700 dinars	Strongly Agree	Strongly Agree	Strongly Agree	Strongly Agree	Agree	Agree	Agree	Agree	Agree	Neutral	Neutral	Neutral	Disagree	Neutral	Agree	Neutral	Agree	Neutral	Agree	Disagree	Disagree	Neutral	Strongly Agree	Agree	Strongly Agree
	2022-05-25 12:58:35	2022-05-25 13:08:59	anonymous	anonymous	M	46-50	Postgraduate	excellent	More than 1000 dinars	Strongly Agree	Strongly Agree	Agree	Strongly Agree	Agree	Strongly Agree	Strongly Agree	Agree	Agree	Agree	Agree	Agree	Neutral	Agree	Agree	Strongly Agree	Strongly Agree	Agree	Agree	Agree	Agree	Strongly Agree	Strongly Agree	Strongly Agree	Agree
	2022-05-25 13:13:10	2022-05-25 13:16:27	anonymous	anonymous	F	36-45	BA	Very well	700-1000 dinars	Agree	Agree	Strongly Agree	Strongly Agree	Agree	Agree	Agree	Agree	Agree	Agree	Agree	Neutral	Neutral	Neutral	Disagree	Disagree	Neutral	Disagree	Disagree	Disagree	Disagree	Strongly Disagree	Agree	Agree	Agree
	2022-05-25 13:57:47	2022-05-25 14:00:18	anonymous	anonymous	M	36-45	BA	excellent	500-700 dinars	Strongly Agree	Agree	Agree	Agree	Agree	Agree	Agree	Agree	Agree	Agree	Agree	Agree	Agree	Agree	Agree	Agree	Agree	Neutral	Agree	Agree	Neutral	Agree	Strongly Agree	Strongly Agree	Strongly Agree
	2022-05-25 15:51:41	2022-05-25 15:55:02	anonymous	anonymous	F	26-35	Postgraduate	Very well	500-700 dinars	Agree	Agree	Agree	Agree	Strongly Agree	Strongly Agree	Strongly Agree	Agree	Agree	Disagree	Disagree	Neutral	Agree	Neutral	Neutral	Neutral	Neutral	Agree	Agree	Disagree	Disagree	Disagree	Neutral	Neutral	Neutral
	2022-05-25 21:30:34	2022-05-25 21:35:06	anonymous	anonymous	F	26-35	BA	Very well	Less than 500 dinars	Disagree	Disagree	Disagree	Disagree	Disagree	Agree	Agree	Disagree	Agree	Agree	Agree	Disagree	Disagree	Agree	Disagree	Disagree	Neutral	Agree	Agree	Agree	Neutral	Neutral	Agree	Disagree	Disagree
	2022-05-25 22:48:00	2022-05-25 22:53:03	anonymous	anonymous	M	36-45	Postgraduate	excellent	More than 1000 dinars	Strongly Agree	Agree	Agree	Agree	Agree	Agree	Agree	Agree	Agree	Neutral	Neutral	Neutral	Agree	Neutral	Agree	Neutral	Agree	Neutral	Agree	Disagree	Disagree	Neutral	Agree	Agree	Agree
	2022-05-25 23:02:47	2022-05-25 23:07:29	anonymous	anonymous	M	46-50	Postgraduate	Very well	More than 1000 dinars	Agree	Agree		Strongly Agree	Agree	Agree	Agree	Agree	Agree	Strongly Agree	Agree	Agree	Agree	Agree	Agree	Agree	Strongly Agree	Agree	Agree	Agree	Agree	Agree	Agree	Agree	Agree
	2022-05-25 23:11:40	2022-05-25 23:14:24	anonymous	anonymous	M	36-45	Postgraduate	excellent	More than 1000 dinars	Strongly Agree	Strongly Agree	Strongly Agree	Strongly Agree	Strongly Disagree	Strongly Agree	Strongly Agree	Strongly Agree	Strongly Agree	Strongly Agree	Strongly Agree	Strongly Agree	Strongly Agree	Strongly Agree	Strongly Agree	Strongly Agree	Strongly Agree	Strongly Agree	Strongly Agree	Strongly Agree	Strongly Agree	Strongly Agree	Strongly Agree	Strongly Agree	Strongly Agree
	2022-05-25 23:59:21	2022-05-26 00:10:26	anonymous	anonymous	F	26-35	BA	Very well	Less than 500 dinars	Agree	Agree	Agree	Agree	Agree	Agree	Agree	Agree	Agree	Neutral	Agree	Neutral	Neutral	Disagree	Neutral	Neutral	Disagree	Agree	Neutral	Disagree	Disagree	Disagree	Disagree	Disagree	Neutral
	2022-05-27 00:32:40	2022-05-27 00:41:37	anonymous	anonymous	F	26-35	Postgraduate	excellent	Less than 500 dinars	Agree	Agree	Neutral	Agree	Neutral	Agree	Neutral	Agree	Agree	Disagree	Disagree	Strongly Disagree	Neutral	Strongly Disagree	Agree	Agree	Neutral	Agree	Neutral	Disagree	Disagree	Neutral	Neutral	Agree	Agree
	2022-05-28 14:01:40	2022-05-28 14:03:51	anonymous	anonymous	F	26-35	diploma	Good	Less than 500 dinars	Disagree	Neutral	Agree	Agree	Neutral	Agree	Agree	Agree	Agree	Agree	Neutral	Disagree	Disagree	Strongly Agree	Neutral	Agree	Agree	Agree	Agree	Disagree	Neutral	Agree	Agree	Agree	Agree
	2022-05-28 14:03:55	2022-05-28 14:05:29	anonymous	anonymous	M	36-45	Postgraduate	Very well	500-700 dinars	Agree	Agree	Strongly Agree	Strongly Agree	Disagree	Disagree	Agree	Neutral	Agree	Strongly Disagree	Disagree	Agree	Neutral	Strongly Agree	Strongly Disagree	Agree	Agree	Agree	Agree	Agree	Agree	Agree	Strongly Agree	Strongly Agree	Agree
	2022-05-31 14:22:12	2022-05-31 14:23:32	anonymous	anonymous	M	46-50	BA	Good	More than 1000 dinars	Disagree	Disagree	Agree	Agree	Disagree	Agree	Disagree	Disagree	Agree	Disagree	Disagree	Disagree	Disagree	Disagree	Disagree	Disagree	Disagree	Disagree	Disagree	Disagree	Agree	Neutral	Disagree	Disagree	Neutral		19
	2022-05-31 16:44:51	2022-05-31 16:48:00	anonymous	anonymous	F	26-35	Postgraduate	Very well	700-1000 dinars	Agree	Agree	Agree	Agree	Neutral	Neutral	Agree	Agree	Agree	Disagree	Neutral	Neutral	Neutral	Neutral	Neutral	Neutral	Neutral	Neutral	Neutral	Disagree	Strongly Agree	Strongly Agree	Neutral	Agree	Agree
	2022-05-31 17:53:34	2022-05-31 18:17:24	anonymous	anonymous	F	26-35	Postgraduate	excellent	More than 1000 dinars	Agree	Agree	Agree	Agree	Agree	Agree	Agree	Agree	Agree	Agree	Strongly Agree	Agree	Neutral	Neutral	Agree	Neutral	Agree	Neutral	Agree	Disagree	Disagree	Agree	Agree	Agree	Agree
	2022-05-31 22:38:05	2022-05-31 22:41:26	anonymous	anonymous	F	26-35	Postgraduate	Very well	More than 1000 dinars	Disagree	Neutral	Disagree	Agree	Agree	Agree	Agree	Neutral	Disagree	Disagree	Disagree	Disagree	Neutral	Disagree	Disagree	Disagree	Neutral	Neutral	Disagree	Agree	Agree	Agree	Neutral	Disagree	Disagree
	2022-05-31 22:37:05	2022-05-31 22:42:57	anonymous	anonymous	F	36-45	Postgraduate	Good	More than 1000 dinars	Agree	Neutral	Agree	Agree	Agree	Agree	Strongly Agree	Agree	Agree	Agree	Agree	Neutral	Disagree	Neutral	Agree	Disagree	Neutral	Disagree	Neutral	Strongly Disagree	Disagree	Neutral	Neutral	Disagree	Neutral
	2022-05-31 23:03:49	2022-05-31 23:08:36	anonymous	anonymous	F	26-35	BA	Very well	More than 1000 dinars	Agree	Agree	Strongly Agree	Strongly Agree	Agree	Neutral	Agree	Neutral	Agree	Disagree	Agree	Disagree	Agree	Neutral	Agree	Neutral	Agree	Strongly Agree	Agree	Disagree	Disagree	Agree	Agree	Agree	Agree
	2022-06-01 06:14:05	2022-06-01 06:17:09	anonymous	anonymous	M	26-35	Postgraduate	excellent	More than 1000 dinars	Agree	Agree	Agree	Agree	Agree	Strongly Agree	Strongly Agree	Neutral	Agree	Neutral	Agree	Neutral	Disagree	Neutral	Agree	Neutral	Agree	Agree	Neutral	Disagree	Neutral	Neutral	Strongly Agree	Neutral	Agree
	2022-06-01 13:42:04	2022-06-01 13:52:19	anonymous	anonymous	F	36-45	Postgraduate	Good	More than 1000 dinars	Agree	Agree	Agree	Agree	Neutral	Agree	Agree	Neutral	Agree	Disagree	Disagree	Disagree	Disagree	Disagree	Disagree	Agree	Agree	Neutral	Neutral	Agree	Agree	Agree	Agree	Agree	Agree
	2022-06-01 20:35:32	2022-06-01 20:38:13	anonymous	anonymous	M	18-25	BA	excellent	Less than 500 dinars	Disagree	Agree	Strongly Agree	Strongly Agree	Strongly Agree	Agree	Agree	Agree	Agree	Disagree	Disagree	Disagree	Disagree	Disagree	Disagree	Disagree	Agree	Agree	Disagree	Disagree	Agree	Agree	Agree	Agree	Agree
	2022-06-01 20:37:47	2022-06-01 20:46:42	anonymous	anonymous	M	36-45	BA	Good	Less than 500 dinars	Agree	Agree	Agree	Strongly Agree	Agree	Agree	Agree	Agree	Agree	Agree	Agree	Neutral	Agree	Agree	Agree	Agree	Agree	Agree	Agree	Disagree	Neutral	Disagree	Agree	Agree	Agree
	2022-06-01 20:45:51	2022-06-01 20:49:03	anonymous	anonymous	M	46-50	High school or less	Good	Less than 500 dinars	Neutral	Disagree	Disagree	Agree	Agree	Agree	Agree	Strongly Agree	Agree	Strongly Agree	Strongly Agree	Strongly Agree	Agree	Agree	Agree	Agree	Agree	Neutral	Neutral	Disagree	Disagree	Neutral	Agree	Disagree	Neutral
	2022-06-01 20:57:17	2022-06-01 21:00:16	anonymous	anonymous	M	46-50	BA	Very well	More than 1000 dinars	Agree	Agree	Agree	Agree	Agree	Strongly Agree	Strongly Agree	Agree	Agree	Strongly Agree	Agree	Agree	Agree	Agree	Strongly Agree	Strongly Agree	Strongly Agree	Agree	Agree	Agree	Disagree	Agree	Strongly Agree	Agree	Strongly Agree		19
	2022-06-02 01:56:03	2022-06-02 02:02:40	anonymous	anonymous	F	26-35	BA	Good	700-1000 dinars	Agree	Agree	Strongly Agree	Strongly Agree	Agree	Neutral	Neutral	Neutral	Neutral	Neutral	Agree	Neutral	Agree	Neutral	Agree	Neutral	Agree	Agree	Neutral	Disagree	Disagree	Agree	Agree	Agree	Agree
	2022-06-02 04:40:45	2022-06-02 04:44:26	anonymous	anonymous	F	26-35	Postgraduate	excellent	More than 1000 dinars	Agree	Agree	Strongly Agree	Agree	Strongly Agree	Strongly Agree	Strongly Agree	Strongly Agree	Strongly Agree	Strongly Agree	Strongly Disagree	Strongly Disagree	Disagree	Strongly Disagree	Neutral	Neutral	Agree	Neutral	Neutral	Strongly Disagree	Agree	Agree	Strongly Agree	Agree	Agree
	2022-06-02 10:34:52	2022-06-02 10:40:29	anonymous	anonymous	F	46-50	Postgraduate	Good	700-1000 dinars	Agree	Agree	Agree	Agree	Agree	Agree	Agree	Agree	Agree	Disagree	Disagree	Disagree	Agree	Disagree	Neutral	Neutral	Neutral	Agree	Neutral	Disagree	Disagree	Disagree	Agree	Agree	Agree
	2022-06-02 10:55:47	2022-06-02 11:04:36	anonymous	anonymous	M	36-45	Postgraduate	Acceptable	700-1000 dinars	Agree	Agree	Agree	Agree	Agree	Neutral	Agree	Neutral	Agree	Neutral	Neutral	Neutral	Neutral	Neutral	Agree	Agree	Agree	Agree	Agree	Agree	Agree	Strongly Agree	Agree	Agree	Agree	In the event that training on using the application and spreading the importance of using the application through social networking sites, television and radio advertisements on the street, this helps to direct the application and also talk about protecting the confidentiality and protection of information. This encourages more
	2022-06-02 14:13:39	2022-06-02 14:16:06	anonymous	anonymous	F	26-35	Postgraduate	Very well	Less than 500 dinars	Agree	Agree	Agree	Agree	Neutral	Agree	Agree	Strongly Agree	Strongly Agree	Disagree	Disagree	Disagree	Agree	Agree	Agree	Agree	Agree	Strongly Agree	Agree	Strongly Agree	Agree	Agree	Agree	Neutral	Neutral
	2022-06-03 18:05:21	2022-06-03 18:07:04	anonymous	anonymous	M	36-45	Postgraduate	Very well	700-1000 dinars	Agree	Agree	Strongly Agree	Neutral	Disagree	Agree	Disagree	Agree	Strongly Agree	Disagree	Strongly Agree	Agree	Strongly Agree	Strongly Agree	Disagree	Agree	Neutral	Neutral	Agree	Agree	Agree	Strongly Agree	Agree	Neutral	Agree
	2022-06-03 18:07:08	2022-06-03 18:09:07	anonymous	anonymous	F	26-35	diploma	Good	500-700 dinars	Agree	Strongly Agree	Strongly Agree	Agree	Neutral	Neutral	Agree	Neutral	Agree	Disagree	Disagree	Neutral	Agree	Agree	Disagree	Agree	Strongly Agree	Strongly Agree	Disagree	Disagree	Agree	Agree	Agree	Agree	Agree
	2022-06-04 11:38:07	2022-06-04 11:41:23	anonymous	anonymous	F	Over 50 years old	BA	Very well	700-1000 dinars	Neutral	Neutral	Agree	Agree	Agree	Neutral	Neutral	Disagree	Disagree	Strongly Disagree	Strongly Disagree	Disagree	Disagree	Strongly Disagree	Strongly Disagree	Disagree	Neutral	Disagree	Neutral	Disagree	Neutral	Neutral	Neutral	Disagree	Neutral
	2022-06-04 15:42:57	2022-06-04 15:46:07	anonymous	anonymous	F	26-35	Postgraduate	excellent	Less than 500 dinars	Agree	Agree	Strongly Agree	Strongly Agree	Agree	Agree	Agree	Agree	Agree	Neutral	Agree	Agree	Agree	Agree	Neutral	Neutral	Neutral	Neutral	Agree	Agree	Agree	Agree	Agree	Agree	Agree
	2022-06-05 11:22:36	2022-06-05 11:23:57	anonymous	anonymous	F	46-50	diploma	Acceptable	Less than 500 dinars	Neutral	Agree	Agree	Strongly Agree	Strongly Disagree	Agree	Strongly Agree	Strongly Agree	Agree	Disagree	Disagree	Neutral	Agree	Disagree	Strongly Disagree	Neutral	Strongly Agree	Agree	Agree	Strongly Disagree	Agree	Agree	Disagree	Agree	Strongly Agree
	2022-06-05 11:24:14	2022-06-05 11:28:05	anonymous	anonymous	F	26-35	BA	Good	500-700 dinars	Strongly Disagree	Agree	Agree	Agree	Disagree	Agree	Strongly Agree	Disagree	Agree	Strongly Disagree	Disagree	Neutral	Disagree	Neutral	Strongly Disagree	Agree	Agree	Neutral	Agree	Agree	Agree	Agree	Disagree	Agree	Agree
	2022-06-06 14:23:47	2022-06-06 14:26:42	anonymous	anonymous	M	Over 50 years old	Postgraduate	excellent	More than 1000 dinars	Strongly Agree	Strongly Agree	Strongly Agree	Strongly Agree	Strongly Agree	Strongly Agree	Strongly Agree	Strongly Agree	Strongly Agree	Agree	Neutral	Disagree	Disagree	Disagree	Strongly Agree	Strongly Agree	Strongly Agree	Strongly Agree	Strongly Agree	Neutral	Neutral	Neutral	Strongly Agree	Strongly Agree	Strongly Agree
	2022-06-06 14:26:45	2022-06-06 14:27:37	anonymous	anonymous	M	46-50	BA	Acceptable	700-1000 dinars	Agree	Agree	Neutral	Agree	Agree	Agree	Agree	Agree	Agree	Agree	Agree	Agree	Agree	Agree	Agree	Agree	Agree	Agree	Agree	Disagree	Disagree	Disagree	Agree	Agree	Agree
	2022-06-06 14:27:40	2022-06-06 14:28:44	anonymous	anonymous	F	26-35	BA	Acceptable	500-700 dinars	Neutral	Neutral	Neutral	Neutral	Neutral	Agree	Agree	Disagree	Agree	Agree	Neutral	Disagree	Agree	Disagree	Agree	Neutral	Disagree	Disagree	Agree	Strongly Agree	Strongly Agree	Strongly Agree	Agree	Neutral	Agree
	2022-06-10 17:51:12	2022-06-10 17:52:53	anonymous	anonymous	M	46-50	Postgraduate	Very well	700-1000 dinars	Neutral	Agree	Agree	Strongly Agree	Agree	Strongly Agree	Neutral	Disagree	Strongly Agree	Disagree	Disagree	Disagree	Agree	Agree	Disagree	Disagree	Neutral	Agree	Strongly Agree	Agree	Agree	Strongly Agree	Agree	Agree	Strongly Agree
	2022-06-11 12:31:42	2022-06-11 12:33:51	anonymous	anonymous	M	18-25	diploma	Acceptable	Less than 500 dinars	Disagree	Agree	Strongly Agree	Agree	Agree	Agree	Agree	Strongly Agree	Strongly Agree	Strongly Disagree	Strongly Disagree	Agree	Agree	Agree	Disagree	Neutral	Agree	Agree	Strongly Agree	Strongly Disagree	Agree	Agree	Agree	Agree	Agree
	2022-06-11 12:34:06	2022-06-11 13:00:05	anonymous	anonymous	F	36-45	BA	Good	500-700 dinars	Agree	Agree	Strongly Agree	Strongly Agree	Neutral	Agree	Agree	Agree	Strongly Agree	Strongly Disagree	Disagree	Neutral	Agree	Agree	Strongly Disagree	Neutral	Agree	Agree	Agree	Agree	Agree	Agree	Strongly Disagree	Agree	Disagree
	2022-06-11 13:00:12	2022-06-11 13:10:10	anonymous	anonymous	M	46-50	Postgraduate	Very well	700-1000 dinars	Disagree	Disagree	Neutral	Agree	Agree	Agree	Strongly Agree	Neutral	Agree	Strongly Disagree	Strongly Disagree	Agree	Neutral	Neutral	Disagree	Agree	Agree	Agree	Agree	Neutral	Neutral	Agree	Agree	Agree	Agree
	2022-06-11 13:10:18	2022-06-11 13:56:01	anonymous	anonymous	M	18-25	BA	Very well	Less than 500 dinars	Disagree	Disagree	Disagree	Agree	Neutral	Agree	Agree	Disagree	Agree	Strongly Disagree	Strongly Disagree	Disagree	Agree	Neutral	Disagree	Disagree	Agree	Neutral	Agree	Agree	Agree	Agree	Agree	Agree	Agree
	2022-06-11 13:56:08	2022-06-11 14:18:25	anonymous	anonymous	M	46-50	diploma	Acceptable	500-700 dinars	Disagree	Agree	Agree	Strongly Agree	Disagree	Agree	Agree	Agree	Strongly Agree	Neutral	Neutral	Neutral	Agree	Agree	Disagree	Agree	Strongly Agree	Strongly Agree	Agree	Agree	Agree	Strongly Agree	Agree	Strongly Agree	Strongly Agree
	2022-06-11 18:41:35	2022-06-11 18:43:28	anonymous	anonymous	F	Over 50 years old	High school or less	Good	Less than 500 dinars	Agree	Agree	Agree	Strongly Agree	Strongly Agree	Strongly Agree	Strongly Agree	Agree	Strongly Agree	Strongly Disagree	Neutral	Agree	Agree	Neutral	Agree	Agree	Agree	Strongly Agree	Agree	Agree	Strongly Agree	Agree	Agree	Strongly Agree	Agree
	2022-06-11 18:43:43	2022-06-11 18:45:35	anonymous	anonymous	M	18-25	BA	Very well	Less than 500 dinars	Disagree	Disagree	Disagree	Neutral	Disagree	Disagree	Neutral	Agree	Agree	Strongly Disagree	Strongly Disagree	Neutral	Disagree	Neutral	Agree	Agree	Agree	Agree	Agree	Agree	Agree	Agree	Strongly Agree	Strongly Agree	Agree
	2023-01-05 20:22:54	2023-01-05 20:22:54	anonymous	anonymous	F	36-45	BA	Very well	Less than 500 dinars	Agree	Agree	Agree	Agree	Strongly Agree	Strongly Agree	Agree	Strongly Agree	Disagree	Agree	Disagree	Disagree	Strongly Agree	Neutral	Strongly Agree	Strongly Disagree	Neutral	Strongly Agree	Disagree	Disagree	Disagree	Strongly Agree	Strongly Agree	Strongly Agree	Agree
	2023-01-05 07:31:23	2023-01-05 07:31:23	anonymous	anonymous	M	36-45	BA	Very well	500-700 dinars	Agree	Strongly Agree	Agree	Agree	Strongly Agree	Agree	Agree	Strongly Agree	Agree	Agree	Disagree	Disagree	Neutral	Neutral	Agree	Disagree	Disagree	Neutral	Agree	Disagree	Disagree	Neutral	Agree	Agree	Strongly Agree
	2023-01-05 18:43:56	2023-01-05 18:43:56	anonymous	anonymous	F	26-35	BA	Very well	500-700 dinars	Disagree	Disagree	Agree	Neutral	Neutral	Agree		Agree	Strongly Agree	Neutral	Agree	Strongly Disagree	Disagree	Agree	Agree	Neutral	Agree	Agree	Disagree	Agree	Strongly Disagree	Agree	Agree	Agree	Agree
	2023-01-05 22:14:47	2023-01-05 22:14:47	anonymous	anonymous	F	Over 50 years old	BA	Very well	700-1000 dinars	Neutral	Agree	Strongly Agree	Strongly Agree	Agree	Agree	Disagree	Agree	Strongly Agree	Agree	Agree	Agree	Agree	Disagree	Neutral	Agree	Neutral	Agree	Neutral	Agree	Agree	Agree	Agree	Neutral	Agree
	2023-01-05 23:38:17	2023-01-05 23:38:17	anonymous	anonymous	F	26-35	BA	Good	More than 1000 dinars	Agree	Strongly Agree	Neutral	Strongly Agree	Agree	Agree	Agree	Agree	Agree	Agree	Disagree	Disagree	Agree	Neutral	Agree	Agree	Agree	Neutral		Neutral	Agree	Neutral	Neutral	Agree	Agree
	2023-01-06 11:50:13	2023-01-06 11:50:13	anonymous	anonymous	F	18-25	Postgraduate	Very well	Less than 500 dinars	Agree	Agree	Strongly Agree	Strongly Agree	Strongly Agree	Agree	Strongly Agree	Disagree	Agree	Disagree	Disagree	Disagree	Neutral	Disagree	Neutral	Neutral	Agree	Agree	Disagree	Neutral	Disagree	Neutral	Disagree	Agree	Neutral
	2023-01-06 12:56:03	2023-01-06 12:56:03	anonymous	anonymous	F	26-35	BA	Very well	Less than 500 dinars	Agree	Neutral	Agree	Strongly Agree	Agree	Agree	Agree	Agree	Agree	Disagree	Neutral	Neutral	Agree	Strongly Disagree	Agree	Disagree	Neutral	Agree	Agree	Agree	Neutral	Disagree	Agree	Neutral	Agree
	2023-01-06 13:23:42	2023-01-06 13:23:42	anonymous	anonymous	F	26-35	BA	excellent	700-1000 dinars	Strongly Agree	Agree	Agree	Agree	Disagree	Agree	Agree	Neutral	Neutral	Agree	Neutral	Disagree	Agree	Neutral	Disagree	Agree	Disagree	Disagree	Agree	Disagree	Neutral	Disagree	Strongly Agree	Strongly Agree	Disagree
	2023-01-06 13:46:35	2023-01-06 13:46:35	anonymous	anonymous	F	46-50	Postgraduate	Very well	More than 1000 dinars	Neutral	Agree	Agree	Agree	Strongly Disagree	Strongly Agree	Agree	Agree	Neutral	Neutral	Agree	Agree	Neutral	Agree	Agree	Agree	Agree	Neutral	Neutral	Disagree	Disagree	Agree	Strongly Agree	Agree	Agree
	2023-01-06 15:11:52	2023-01-06 15:11:52	anonymous	anonymous	M	26-35	Postgraduate	Good	700-1000 dinars	Agree	Agree	Neutral	Strongly Agree	Strongly Disagree	Strongly Agree	Strongly Agree	Agree	Strongly Agree	Agree	Neutral	Neutral	Disagree	Neutral	Agree	Neutral	Agree	Neutral	Strongly Agree	Disagree	Disagree	Agree	Agree	Neutral	Strongly Agree
	2023-01-06 19:33:25	2023-01-06 19:33:25	anonymous	anonymous	M	Over 50 years old	Postgraduate	excellent	500-700 dinars	Neutral	Strongly Agree	Agree	Neutral	Agree	Agree	Strongly Agree	Strongly Agree	Agree	Neutral	Neutral	Neutral	Neutral	Strongly Agree	Neutral	Disagree	Neutral	Agree	Agree	Neutral	Agree	Neutral	Agree	Neutral	Neutral
	2023-01-06 19:49:27	2023-01-06 20:12:02	anonymous	anonymous	F	18-25	BA	Good	Less than 500 dinars	Agree	Agree	Agree	Strongly Agree	Neutral	Agree	Strongly Agree	Strongly Agree	Agree	Strongly Disagree	Agree	Agree	Agree	Agree	Agree	Neutral	Disagree	Agree	Neutral	Neutral	Agree	Strongly Disagree	Neutral	Agree	Agree
	2023-01-06 20:38:15	2023-01-06 20:46:34	anonymous	anonymous	F	26-35	Postgraduate	Good	700-1000 dinars	Strongly Agree	Agree	Strongly Agree	Agree	Agree	Strongly Agree	Agree	Agree	Agree	Strongly Disagree	Neutral	Agree	Agree	Agree	Disagree	Neutral	Agree	Agree	Agree	Strongly Disagree	Agree	Disagree	Agree	Agree	Neutral
	2023-01-06 22:46:05	2023-01-06 22:58:23	anonymous	anonymous	F	36-45	Postgraduate	Good	700-1000 dinars	Neutral	Agree	Strongly Agree	Strongly Agree	Agree	Agree	Strongly Agree	Neutral	Strongly Agree	Disagree	Strongly Disagree	Neutral	Neutral	Neutral	Neutral	Agree	Agree	Agree	Agree	Agree	Neutral	Strongly Disagree	Disagree	Agree	Agree
	2023-01-07 11:06:33	2023-01-07 11:18:51	anonymous	anonymous	M	18-25	diploma	Very well	More than 1000 dinars	Agree	Agree	Agree	Agree	Strongly Agree	Strongly Agree	Strongly Agree	Agree	Agree	Agree	Agree	Agree	Agree	Strongly Agree	Agree	Strongly Disagree	Neutral	Neutral	Neutral	Disagree	Neutral	Agree	Neutral	Disagree	Neutral
	2023-01-07 18:14:36	2023-01-07 18:25:27	anonymous	anonymous	M	18-25	BA	Very well	500-700 dinars	Agree	Neutral	Agree	Strongly Agree	Agree	Agree	Agree	Agree	Neutral	Agree	Disagree	Neutral	Disagree	Neutral	Agree	Neutral	Disagree	Neutral	Agree	Disagree	Strongly Disagree	Neutral	Neutral	Neutral	Neutral
	2023-01-07 21:17:33	2023-01-07 21:31:17	anonymous	anonymous	M	36-45	BA	Good	500-700 dinars	Agree	Agree	Agree	Strongly Agree	Disagree	Agree	Strongly Agree	Strongly Agree	Neutral	Disagree	Agree	Disagree	Neutral	Disagree	Neutral	Neutral	Agree	Agree	Disagree	Neutral	Disagree	Agree	Agree	Neutral	Disagree
	2023-01-08 16:27:21	2023-01-08 16:41:08	anonymous	anonymous	F	18-25	Postgraduate	excellent	More than 1000 dinars	Disagree	Agree	Strongly Agree	Strongly Agree	Agree	Strongly Agree	Strongly Agree	Strongly Agree	Agree	Neutral	Strongly Disagree	Disagree	Agree	Agree	Agree	Agree	Neutral	Agree	Neutral	Neutral	Agree	Neutral	Neutral	Agree	Agree
	2023-01-09 05:31:08	2023-01-09 05:47:15	anonymous	anonymous	M	18-25	BA	excellent	700-1000 dinars	Agree	Agree	Agree	Agree	Agree	Agree	Neutral	Agree	Disagree	Disagree	Agree	Strongly Disagree	Disagree	Neutral	Strongly Agree	Disagree	Agree	Agree	Agree	Agree	Agree	Agree	Strongly Agree	Agree	Agree
	2023-01-10 07:08:41	2023-01-10 07:24:50	anonymous	anonymous	M	36-45	BA	Acceptable	More than 1000 dinars	Agree	Agree	Neutral	Agree	Strongly Agree	Agree	Agree	Agree	Strongly Agree	Agree	Disagree	Disagree	Disagree	Neutral	Neutral	Agree	Neutral	Disagree	Strongly Agree	Neutral	Disagree	Disagree	Neutral	Strongly Agree	Agree
	2023-01-10 09:11:51	2023-01-10 09:34:28	anonymous	anonymous	F	36-45	Postgraduate	Very well	500-700 dinars	Agree	Strongly Agree	Disagree	Agree	Agree	Neutral	Disagree	Neutral	Agree	Neutral	Disagree	Agree	Neutral	Strongly Disagree	Agree	Neutral	Strongly Agree	Neutral	Neutral	Disagree	Disagree	Disagree	Agree	Strongly Agree	Agree
	2023-01-10 09:26:37	2023-01-10 09:43:09	anonymous	anonymous	F	18-25	BA	Good	More than 1000 dinars	Neutral	Agree	Agree	Disagree	Agree	Agree	Agree	Strongly Agree	Strongly Agree	Neutral	Neutral	Neutral	Strongly Agree	Disagree	Agree	Neutral	Agree	Neutral	Disagree	Neutral	Neutral	Strongly Agree	Agree	Neutral	Agree
	2023-01-10 09:28:05	2023-01-10 09:47:31	anonymous	anonymous	F	36-45	BA	excellent	Less than 500 dinars	Strongly Agree	Agree	Agree	Disagree	Disagree	Agree	Strongly Agree	Agree	Agree	Agree	Agree	Neutral	Neutral	Agree	Agree	Strongly Agree	Agree	Agree	Disagree	Disagree	Strongly Agree	Agree	Agree	Agree	Agree
	2023-01-10 10:14:03	2023-01-10 10:26:53	anonymous	anonymous	M	26-35	BA	Good	Less than 500 dinars	Strongly Agree	Agree	Agree	Neutral	Neutral	Neutral	Neutral	Agree	Agree	Strongly Disagree	Neutral	Disagree	Agree	Neutral	Neutral	Neutral	Neutral	Neutral	Agree	Disagree	Neutral	Neutral	Neutral	Agree	Agree
	2023-01-10 10:26:39	2023-01-10 10:39:27	anonymous	anonymous	F	18-25	BA	Very well	Less than 500 dinars	Neutral	Agree	Neutral	Strongly Agree	Agree	Agree	Agree	Disagree	Disagree	Disagree	Disagree	Neutral	Agree	Neutral	Agree	Agree	Strongly Agree	Strongly Agree	Agree	Agree	Neutral	Neutral	Neutral	Agree	Neutral
	2023-01-10 11:50:28	2023-01-10 12:04:32	anonymous	anonymous	M	Over 50 years old	Postgraduate	excellent	700-1000 dinars	Strongly Agree	Agree	Strongly Agree	Strongly Agree	Agree	Neutral	Strongly Agree	Agree	Agree	Neutral	Disagree	Disagree	Strongly Disagree	Neutral	Agree	Agree	Strongly Agree	Agree	Neutral	Agree	Disagree	Neutral	Neutral	Neutral	Agree
	2023-01-10 12:08:37	2023-01-10 12:19:46	anonymous	anonymous	M	18-25	Postgraduate	Good	500-700 dinars	Strongly Agree	Neutral	Agree	Agree	Agree	Agree	Agree	Neutral	Neutral	Agree	Disagree	Strongly Disagree	Agree	Agree	Neutral	Strongly Disagree	Agree	Agree	Agree	Neutral	Agree	Disagree	Neutral	Disagree	Strongly Agree
	2023-01-10 14:18:09	2023-01-10 14:32:54	anonymous	anonymous	F	26-35	BA	Good	500-700 dinars	Agree	Agree	Agree	Agree	Agree	Agree	Neutral	Agree	Agree	Disagree	Disagree	Neutral	Agree	Neutral	Neutral	Neutral	Neutral	Neutral	Disagree	Disagree	Neutral	Disagree	Agree	Neutral	Agree
	2023-01-10 14:35:14	2023-01-10 14:50:18	anonymous	anonymous	F	36-45	BA	excellent	More than 1000 dinars	Neutral	Agree	Agree	Strongly Agree	Agree	Strongly Agree	Neutral	Strongly Agree	Strongly Agree	Agree	Disagree	Neutral	Disagree	Disagree	Strongly Agree	Agree	Agree	Agree	Agree	Disagree	Neutral	Agree	Agree	Agree	Agree
	2023-01-10 14:36:58	2023-01-10 14:47:29	anonymous	anonymous	M	26-35	BA	Acceptable	500-700 dinars	Agree	Neutral	Neutral	Agree	Strongly Agree	Strongly Agree	Agree	Strongly Agree	Strongly Agree	Disagree	Strongly Disagree	Agree	Agree	Neutral	Agree	Agree	Agree	Neutral	Agree	Agree	Disagree	Agree	Agree	Agree	Disagree
	2023-01-10 14:41:05	2023-01-10 14:41:05	anonymous	anonymous	M	26-35	Postgraduate	Good	Less than 500 dinars	Neutral	Disagree	Neutral	Strongly Agree	Neutral	Agree	Agree	Agree	Neutral	Strongly Disagree	Strongly Disagree	Neutral	Neutral	Neutral	Neutral	Disagree	Disagree	Agree	Disagree	Neutral	Disagree	Neutral	Neutral	Disagree	Neutral
	2023-01-10 16:02:13	2023-01-10 16:18:03	anonymous	anonymous	F	18-25	BA	Good	700-1000 dinars	Agree	Agree	Agree	Strongly Agree	Neutral	Agree	Strongly Agree	Agree	Agree	Disagree	Disagree	Disagree	Agree	Neutral	Neutral	Agree	Agree	Neutral	Neutral	Disagree	Agree	Neutral	Neutral	Neutral	Agree
	2023-01-10 16:12:56	2023-01-10 16:23:21	anonymous	anonymous	M	46-50	BA	Very well	Less than 500 dinars	Agree	Agree	Agree	Agree	Strongly Agree	Agree	Strongly Agree	Agree	Agree	Agree	Agree	Agree	Neutral	Strongly Agree	Agree	Disagree	Strongly Agree	Neutral	Neutral	Neutral	Strongly Agree	Agree	Agree	Neutral	Neutral
	2023-01-10 17:06:18	2023-01-10 17:12:42	anonymous	anonymous	F	18-25	Postgraduate	Very well	700-1000 dinars	Strongly Agree	Agree	Strongly Agree	Strongly Agree	Strongly Agree	Disagree	Agree	Neutral	Agree	Strongly Disagree	Agree	Strongly Disagree	Strongly Disagree	Agree	Strongly Disagree	Disagree	Agree	Agree	Neutral	Agree	Neutral	Disagree	Agree	Disagree	Agree
	2023-01-10 17:11:10	2023-01-10 17:20:17	anonymous	anonymous	M	36-45	BA	Good	700-1000 dinars	Agree	Neutral	Strongly Agree	Agree	Strongly Agree	Neutral	Agree	Agree	Agree	Disagree	Neutral	Neutral	Neutral	Disagree	Agree	Neutral	Agree	Neutral	Strongly Agree	Neutral	Agree	Neutral	Strongly Agree	Neutral	Agree
	2023-01-10 18:33:17	2023-01-10 18:43:38	anonymous	anonymous	M	26-35	BA	Good	More than 1000 dinars	Strongly Agree	Agree	Agree	Strongly Agree	Agree	Strongly Agree	Strongly Agree	Agree	Neutral	Agree	Strongly Disagree	Disagree	Neutral	Neutral	Agree	Neutral	Neutral	Neutral	Agree	Disagree	Strongly Disagree	Agree	Neutral	Agree	Neutral
	2023-01-10 18:44:17	2023-01-10 18:52:49	anonymous	anonymous	F	18-25	BA	Acceptable	700-1000 dinars	Agree	Agree	Agree	Strongly Agree	Agree	Strongly Agree	Neutral	Neutral	Strongly Agree	Agree	Strongly Disagree	Neutral	Disagree	Neutral	Neutral	Disagree	Neutral	Agree	Neutral	Strongly Disagree	Neutral	Neutral	Strongly Agree	Neutral	Strongly Agree
	2023-01-10 18:47:05	2023-01-10 18:58:45	anonymous	anonymous	M	46-50	BA	Very well	700-1000 dinars	Disagree	Agree	Strongly Agree	Agree	Agree	Neutral	Agree	Agree	Neutral	Neutral	Disagree	Agree	Agree	Agree	Agree	Agree	Agree	Strongly Agree	Agree	Agree	Agree	Neutral	Agree	Agree	Agree
	2023-01-10 18:51:37	2023-01-10 19:02:46	anonymous	anonymous	M	18-25	Postgraduate	Very well	500-700 dinars	Neutral	Neutral	Agree	Agree	Agree	Agree	Agree	Strongly Agree	Neutral	Agree	Disagree	Neutral	Agree	Neutral	Disagree	Neutral	Neutral	Neutral	Disagree	Disagree	Neutral	Agree	Disagree	Agree	Agree
	2023-01-10 19:06:30	2023-01-10 19:18:32	anonymous	anonymous	F	46-50	BA	Very well	Less than 500 dinars	Neutral	Agree	Neutral	Neutral	Agree	Agree	Strongly Agree	Neutral	Agree	Disagree	Neutral	Disagree	Disagree	Disagree	Disagree	Agree	Agree	Neutral	Agree	Neutral	Neutral	Neutral	Agree	Strongly Agree	Neutral
	2023-01-10 19:12:53	2023-01-10 19:28:49	anonymous	anonymous	F	36-45	BA	Good	More than 1000 dinars	Strongly Agree	Neutral	Agree	Agree	Strongly Agree	Strongly Agree	Strongly Agree	Agree	Strongly Agree	Disagree	Agree	Disagree	Neutral	Neutral	Neutral	Disagree	Neutral	Agree	Neutral	Disagree	Disagree	Agree	Strongly Agree	Agree	Neutral
	2023-01-11 00:12:03	2023-01-11 00:20:36	anonymous	anonymous	M	26-35	BA	Acceptable	500-700 dinars	Strongly Agree	Agree	Disagree	Strongly Agree	Agree	Disagree	Neutral	Strongly Agree	Disagree	Neutral	Agree	Neutral	Agree	Neutral	Agree	Agree	Agree	Disagree	Neutral	Neutral	Disagree	Disagree	Agree	Neutral	Agree
	2023-01-11 05:42:56	2023-01-11 05:53:41	anonymous	anonymous	M	18-25	BA	Very well	700-1000 dinars	Agree	Neutral	Strongly Agree	Agree	Neutral	Agree	Agree	Agree	Agree	Agree	Strongly Agree	Neutral	Agree	Agree	Neutral	Agree	Neutral	Agree	Agree	Disagree	Agree	Disagree	Neutral	Agree	Agree
	2023-01-11 06:35:45	2023-01-11 06:42:23	anonymous	anonymous	F	46-50	diploma	Very well	700-1000 dinars	Strongly Agree	Agree	Agree	Agree	Agree	Agree	Agree	Neutral	Neutral	Neutral	Disagree	Agree	Agree	Disagree	Agree	Neutral	Agree	Agree	Disagree	Disagree	Disagree	Agree	Neutral	Neutral	Agree
	2023-01-11 08:45:07	2023-01-11 08:53:14	anonymous	anonymous	M	18-25	Postgraduate	Very well	500-700 dinars	Neutral	Agree	Agree	Strongly Agree	Agree	Strongly Agree	Neutral	Neutral	Neutral	Neutral	Neutral	Neutral	Disagree	Strongly Agree	Agree	Agree	Strongly Agree	Agree	Neutral	Neutral	Neutral	Neutral	Agree	Disagree	Neutral
	2023-01-11 08:58:17	2023-01-11 09:14:02	anonymous	anonymous	F	26-35	BA	Good	Less than 500 dinars	Neutral	Agree	Disagree	Agree	Strongly Agree	Agree	Strongly Agree	Agree	Neutral	Agree	Disagree	Strongly Disagree	Neutral	Neutral	Disagree	Neutral	Disagree	Neutral	Strongly Agree	Strongly Disagree	Agree	Neutral	Disagree	Agree	Neutral
	2023-01-11 10:22:43	2023-01-11 10:34:26	anonymous	anonymous	M	36-45	Postgraduate	Very well	More than 1000 dinars	Strongly Agree	Agree	Neutral	Strongly Agree	Neutral	Agree	Agree	Agree	Agree	Strongly Disagree	Agree	Agree	Strongly Disagree	Agree	Disagree	Neutral	Agree	Agree	Neutral	Neutral	Strongly Disagree	Agree	Neutral	Agree	Agree
	2023-01-11 11:21:45	2023-01-11 11:30:37	anonymous	anonymous	M	36-45	BA	weak	700-1000 dinars	Agree	Neutral	Strongly Agree	Strongly Agree	Agree	Neutral	Neutral	Neutral	Agree	Neutral	Strongly Agree	Agree	Neutral	Agree	Agree	Disagree	Neutral	Neutral	Agree	Agree	Neutral	Strongly Disagree	Agree	Agree	Strongly Agree	Great Job
	2023-01-11 14:16:48	2023-01-11 14:29:31	anonymous	anonymous	M	26-35	High school or less	excellent	500-700 dinars	Agree	Agree	Agree	Agree	Agree	Agree	Agree	Neutral	Agree	Disagree	Agree	Neutral	Neutral	Neutral	Agree	Agree	Neutral	Agree	Agree	Agree	Neutral	Agree	Agree	Agree	Disagree
	2023-01-11 18:01:40	2023-01-11 18:12:58	anonymous	anonymous	F	26-35	BA	Acceptable	500-700 dinars	Strongly Agree	Agree	Agree	Agree	Strongly Agree	Neutral	Strongly Agree	Agree	Agree	Disagree	Disagree	Disagree	Agree	Disagree	Neutral	Agree	Neutral	Neutral	Neutral	Neutral	Agree	Disagree	Agree	Agree	Agree
	2023-01-11 20:37:50	2023-01-11 20:49:02	anonymous	anonymous	F	26-35	BA	Very well	Less than 500 dinars	Strongly Agree	Strongly Agree	Agree	Agree	Neutral	Agree	Agree	Agree	Agree	Agree	Agree	Disagree	Disagree	Disagree	Strongly Agree	Strongly Disagree	Strongly Agree	Strongly Agree	Neutral	Disagree	Neutral	Agree	Neutral	Agree	Agree
	2023-01-11 20:42:16	2023-01-11 20:51:26	anonymous	anonymous	F	26-35	BA	Very well	500-700 dinars	Agree	Agree	Neutral	Agree	Neutral	Neutral	Neutral	Agree	Neutral	Neutral	Disagree	Disagree	Agree	Neutral	Neutral	Neutral	Neutral	Neutral	Agree	Disagree	Neutral	Neutral	Agree	Neutral	Neutral
	2023-01-11 22:05:11	2023-01-11 22:14:55	anonymous	anonymous	F	18-25	Postgraduate	Acceptable	More than 1000 dinars	Neutral	Strongly Agree	Agree	Agree	Agree	Neutral	Strongly Agree	Agree	Strongly Agree	Strongly Agree	Agree	Agree	Neutral	Agree	Agree	Neutral	Agree	Neutral	Agree	Neutral	Disagree	Disagree	Neutral	Agree	Neutral
	2023-01-11 22:32:43	2023-01-11 22:39:53	anonymous	anonymous	M	46-50	Postgraduate	excellent	500-700 dinars	Agree	Agree	Agree	Agree	Neutral	Strongly Agree	Agree	Strongly Agree	Strongly Agree	Agree	Neutral	Agree	Neutral	Agree	Neutral	Disagree	Neutral	Neutral	Neutral	Disagree	Neutral	Neutral	Disagree	Agree	Agree
	2023-01-11 22:42:08	2023-01-11 22:51:46	anonymous	anonymous	M	36-45	BA	excellent	More than 1000 dinars	Neutral	Agree	Strongly Agree	Strongly Agree	Agree	Agree	Disagree	Strongly Agree	Agree	Neutral	Neutral	Neutral	Disagree	Strongly Agree	Agree	Neutral	Neutral	Agree	Neutral	Disagree	Neutral	Strongly Disagree	Agree	Strongly Agree	Agree
	2023-01-11 22:55:01	2023-01-11 23:09:12	anonymous	anonymous	M	18-25	BA	Good	500-700 dinars	Neutral	Agree	Neutral	Agree	Strongly Agree	Agree	Strongly Agree	Agree	Neutral	Agree	Agree	Agree	Agree	Neutral	Disagree	Agree	Disagree	Agree	Neutral	Neutral	Agree	Agree	Agree	Agree	Agree
	2023-01-12 09:10:26	2023-01-12 09:21:36	anonymous	anonymous	M	36-45	BA	Good	500-700 dinars	Agree	Agree	Agree	Neutral	Agree	Strongly Agree	Strongly Agree	Agree	Agree	Neutral	Strongly Disagree	Disagree	Agree	Neutral	Agree	Neutral	Agree	Disagree	Agree	Disagree	Agree	Neutral	Agree	Neutral	Disagree
	2023-01-12 09:12:37	2023-01-12 09:24:30	anonymous	anonymous	M	26-35	BA	excellent	Less than 500 dinars	Strongly Agree	Neutral	Agree	Agree	Agree	Agree	Agree	Agree	Agree	Disagree	Agree	Agree	Neutral	Agree	Disagree	Disagree	Agree	Disagree	Agree	Agree	Disagree	Disagree	Neutral	Neutral	Neutral
	2023-01-12 10:01:15	2023-01-12 10:12:35	anonymous	anonymous	F	26-35	BA	Very well	500-700 dinars	Disagree	Agree	Disagree	Neutral	Neutral	Agree	Agree	Disagree	Disagree	Agree	Disagree	Strongly Agree	Agree	Disagree	Agree	Strongly Agree	Strongly Agree	Agree	Neutral	Disagree	Disagree	Neutral	Agree	Disagree	Neutral
	2023-01-12 10:13:28	2023-01-12 10:21:50	anonymous	anonymous	M	18-25	BA	Very well	500-700 dinars	Agree	Agree	Neutral	Neutral	Agree	Disagree	Neutral	Neutral	Neutral	Neutral	Agree	Neutral	Agree	Agree	Neutral	Strongly Agree	Strongly Disagree	Neutral	Disagree	Neutral	Agree	Agree	Agree	Agree	Agree
	2023-01-12 10:29:06	2023-01-12 10:42:16	anonymous	anonymous	M	36-45	BA	Very well	Less than 500 dinars	Strongly Agree	Agree	Strongly Agree	Agree	Agree	Agree	Strongly Agree	Agree	Neutral	Disagree	Neutral	Neutral	Agree	Agree	Neutral	Agree	Neutral	Neutral	Disagree	Agree	Neutral	Neutral	Agree	Agree	Neutral
	2023-01-12 11:18:32	2023-01-12 11:30:15	anonymous	anonymous	F	26-35	BA	Good	More than 1000 dinars	Agree	Neutral	Agree	Strongly Agree	Strongly Agree	Agree	Strongly Agree	Agree	Agree	Disagree	Disagree	Disagree	Disagree	Disagree	Agree	Disagree	Neutral	Neutral	Agree	Disagree	Disagree	Agree	Agree	Neutral	Agree
	2023-01-12 11:21:38	2023-01-12 11:34:27	anonymous	anonymous	F	36-45	BA	Very well	700-1000 dinars	Agree	Neutral	Disagree	Agree	Neutral	Agree	Agree	Neutral	Strongly Agree	Agree	Neutral	Agree	Neutral	Disagree	Strongly Agree	Neutral	Agree	Agree	Neutral	Disagree	Agree	Strongly Agree	Agree	Disagree	Neutral
	2023-01-12 11:42:48	2023-01-12 11:54:59	anonymous	anonymous	F	26-35	Postgraduate	Very well	500-700 dinars	Strongly Agree	Agree	Neutral	Agree	Agree	Strongly Agree	Neutral	Disagree	Strongly Agree	Agree	Agree	Agree	Neutral	Neutral	Disagree	Agree	Neutral	Agree	Neutral	Neutral	Neutral	Disagree	Strongly Agree	Neutral	Agree
	2023-01-12 12:50:04	2023-01-12 13:01:46	anonymous	anonymous	M	46-50	BA	Acceptable	500-700 dinars	Agree	Agree	Agree	Strongly Agree	Neutral	Agree	Neutral	Agree	Agree	Agree	Disagree	Disagree	Agree	Agree	Neutral	Agree	Agree	Agree	Strongly Agree	Neutral	Neutral	Disagree	Disagree	Agree	Strongly Agree
	2023-01-12 13:24:27	2023-01-12 13:36:42	anonymous	anonymous	M	18-25	BA	excellent	Less than 500 dinars	Neutral	Disagree	Agree	Agree	Strongly Agree	Agree	Agree	Agree	Strongly Agree	Neutral	Neutral	Agree	Agree	Agree	Neutral	Disagree	Agree	Agree	Neutral	Neutral	Strongly Agree	Neutral	Strongly Agree	Agree	Agree
	2023-01-12 13:37:07	2023-01-12 13:46:27	anonymous	anonymous	M	36-45	BA	Good	500-700 dinars	Agree	Agree	Strongly Agree	Agree	Neutral	Agree	Agree	Strongly Agree	Strongly Agree	Disagree	Agree	Agree	Agree	Disagree	Agree	Neutral	Agree	Agree	Neutral	Disagree	Neutral	Disagree	Agree	Neutral	Agree
	2023-01-12 13:41:18	2023-01-12 13:52:12	anonymous	anonymous	F	18-25	BA	Good	More than 1000 dinars	Agree	Neutral	Agree	Disagree	Agree	Strongly Agree	Agree	Agree	Neutral	Disagree	Agree	Strongly Agree	Disagree	Neutral	Disagree	Agree	Neutral	Agree	Agree	Neutral	Agree	Agree	Neutral	Agree	Agree
	2023-01-12 13:53:31	2023-01-12 14:04:37	anonymous	anonymous	M	36-45	BA	Very well	Less than 500 dinars	Agree	Agree	Agree	Agree	Agree	Neutral	Strongly Agree	Neutral	Agree	Agree	Agree	Agree	Agree	Neutral	Agree	Neutral	Agree	Neutral	Agree	Neutral	Disagree	Neutral	Neutral	Agree	Neutral
	2023-01-12 17:31:17	2023-01-12 17:39:52	anonymous	anonymous	M	18-25	BA	Very well	More than 1000 dinars	Strongly Agree	Agree	Neutral	Neutral	Agree	Strongly Agree	Agree	Neutral	Agree	Neutral	Neutral	Neutral	Neutral	Disagree	Agree	Disagree	Neutral	Neutral	Disagree	Disagree	Disagree	Disagree	Agree	Neutral	Neutral
	2023-01-12 19:42:54	2023-01-12 19:51:30	anonymous	anonymous	F	26-35	BA	Acceptable	700-1000 dinars	Agree	Neutral	Strongly Agree	Agree	Agree	Agree	Agree	Agree	Agree	Disagree	Neutral	Neutral	Neutral	Agree	Neutral	Agree	Disagree	Disagree	Neutral	Neutral	Agree	Agree	Disagree	Agree	Disagree	I confirm and support the idea
	2023-01-12 19:53:08	2023-01-12 20:04:12	anonymous	anonymous	F	18-25	Postgraduate	Very well	700-1000 dinars	Agree	Agree	Agree	Disagree	Neutral	Neutral	Strongly Agree	Strongly Agree	Neutral	Agree	Neutral	Neutral	Neutral	Strongly Disagree	Neutral	Neutral	Disagree	Neutral	Disagree	Disagree	Neutral	Agree	Agree	Agree	Strongly Agree
	2023-01-12 19:57:31	2023-01-12 20:09:28	anonymous	anonymous	F	26-35	BA	excellent	More than 1000 dinars	Strongly Disagree	Agree	Agree	Agree	Disagree	Agree	Strongly Agree	Agree	Agree	Agree	Neutral	Neutral	Disagree	Agree	Neutral	Strongly Agree	Agree	Disagree	Agree	Strongly Agree	Agree	Disagree	Agree	Disagree	Agree
	2023-01-12 21:04:37	2023-01-12 21:18:38	anonymous	anonymous	M	46-50	Postgraduate	Good	More than 1000 dinars	Neutral	Agree	Agree	Agree	Neutral	Neutral	Neutral	Strongly Agree	Neutral	Strongly Agree	Neutral	Disagree	Agree	Neutral	Strongly Agree	Disagree	Neutral	Strongly Agree	Strongly Agree	Neutral	Agree	Disagree	Agree	Agree	Agree
	2023-01-12 21:13:28	2023-01-12 21:22:15	anonymous	anonymous	M	36-45	BA	Acceptable	500-700 dinars	Disagree	Disagree	Agree	Strongly Agree	Agree	Agree	Agree	Agree	Agree	Agree	Strongly Agree	Neutral	Strongly Agree	Agree	Neutral	Neutral	Neutral	Neutral	Agree	Neutral	Neutral	Neutral	Neutral	Agree	Agree
	2023-01-12 21:21:58	2023-01-12 21:30:41	anonymous	anonymous	M	26-35	BA	Very well	700-1000 dinars	Neutral	Neutral	Neutral	Agree	Strongly Agree	Agree	Strongly Agree	Neutral	Neutral	Agree	Disagree	Agree	Disagree	Agree	Disagree	Agree	Neutral	Agree	Neutral	Agree	Disagree	Agree	Strongly Agree	Neutral	Neutral
	2023-01-12 22:30:53	2023-01-12 22:43:15	anonymous	anonymous	M	26-35	BA	Very well	Less than 500 dinars	Agree	Agree	Agree	Strongly Agree	Agree	Neutral	Neutral	Neutral	Neutral	Disagree	Disagree	Disagree	Agree	Neutral	Agree	Agree	Strongly Agree	Disagree	Strongly Disagree	Neutral	Neutral	Strongly Agree	Strongly Disagree	Agree	Neutral	Good LUCK
	2023-01-12 22:27:32	2023-01-12 22:39:05	anonymous	anonymous	M	18-25	BA	excellent	700-1000 dinars	Agree	Agree	Neutral	Neutral	Agree	Agree	Agree	Agree	Agree	Neutral	Agree	Agree	Agree	Neutral	Disagree	Neutral		Strongly Disagree	Strongly Agree	Neutral	Neutral	Disagree	Agree	Strongly Agree	Agree
	2023-01-12 22:34:18	2023-01-12 22:42:39	anonymous	anonymous	F	36-45	BA	excellent	More than 1000 dinars	Strongly Disagree	Agree	Agree	Neutral	Agree	Agree	Strongly Agree	Agree	Agree	Agree	Strongly Agree	Disagree	Agree	Agree	Agree	Agree	Agree	Agree	Agree	Disagree	Agree	Agree	Agree	Neutral	Strongly Agree
	2023-01-13 10:13:27	2023-01-13 10:26:34	anonymous	anonymous	M	18-25	Postgraduate	Good	500-700 dinars	Agree	Strongly Agree	Strongly Agree	Strongly Agree	Neutral	Agree	Agree	Agree	Strongly Agree	Disagree	Disagree	Agree	Agree	Disagree	Agree	Strongly Agree	Agree	Agree	Strongly Agree	Neutral	Agree	Agree	Disagree	Neutral	Neutral
	2023-01-13 12:54:02	2023-01-13 13:05:23	anonymous	anonymous	M	26-35	Postgraduate	weak	More than 1000 dinars	Agree	Strongly Agree	Neutral	Agree	Agree	Strongly Agree	Agree	Neutral	Neutral	Neutral	Strongly Disagree	Neutral	Strongly Agree	Neutral	Strongly Agree	Disagree	Disagree	Neutral	Agree	Disagree	Disagree	Neutral	Agree	Agree	Neutral
	2023-01-13 13:21:54	2023-01-13 13:34:26	anonymous	anonymous	M	36-45	Postgraduate	Acceptable	500-700 dinars	Strongly Disagree	Agree	Agree	Agree	Agree	Agree	Neutral	Disagree	Agree	Neutral	Neutral	Agree	Neutral	Agree	Agree	Strongly Disagree	Neutral	Agree	Neutral	Agree	Neutral	Disagree	Disagree	Neutral	Agree
	2023-01-13 13:36:12	2023-01-13 13:46:30	anonymous	anonymous	M	26-35	BA	Very well	500-700 dinars	Agree	Strongly Agree	Agree	Strongly Agree	Strongly Disagree	Agree	Agree	Disagree	Strongly Agree	Agree	Neutral	Neutral	Agree	Neutral	Disagree	Neutral	Agree	Agree	Agree	Neutral	Agree	Agree	Neutral	Agree	Agree
	2023-01-13 17:46:23	2023-01-13 17:57:45	anonymous	anonymous	M	46-50	BA	Very well	Less than 500 dinars	Agree	Neutral	Neutral	Neutral	Agree	Agree	Strongly Agree	Agree	Strongly Agree	Agree	Agree	Neutral	Disagree	Neutral	Neutral	Neutral	Agree	Neutral	Neutral	Neutral	Strongly Agree	Agree	Strongly Agree	Agree	Neutral
	2023-01-13 18:12:58	2023-01-13 18:24:14	anonymous	anonymous	M	36-45	BA	excellent	500-700 dinars	Neutral	Agree	Agree	Agree	Agree	Strongly Agree	Agree	Neutral	Agree	Neutral	Neutral	Disagree	Neutral	Strongly Disagree	Neutral	Disagree	Disagree	Agree	Disagree	Neutral	Neutral	Strongly Disagree	Agree	Agree	Strongly Agree
	2023-01-13 18:23:50	2023-01-13 18:35:06	anonymous	anonymous	F	18-25	BA	Very well	500-700 dinars	Agree	Strongly Agree	Agree	Agree	Agree	Agree	Neutral	Strongly Agree	Agree	Disagree	Agree	Agree	Agree	Neutral	Neutral	Neutral	Neutral	Disagree	Agree	Disagree	Disagree	Disagree	Neutral	Neutral	Agree
	2023-01-13 18:51:28	2023-01-13 19:03:27	anonymous	anonymous	F	Over 50 years old	Postgraduate	excellent	Less than 500 dinars	Strongly Disagree	Agree	Disagree	Strongly Agree	Disagree	Agree	Agree	Neutral	Agree	Disagree	Agree	Agree	Disagree	Agree	Agree	Disagree	Agree	Disagree	Neutral	Disagree	Agree	Neutral	Agree	Neutral	Agree
	2023-01-13 21:23:17	2023-01-13 21:31:48	anonymous	anonymous	M	26-35	BA	Very well	700-1000 dinars	Neutral	Agree	Neutral	Agree	Agree	Agree	Agree	Strongly Agree	Agree	Neutral	Agree	Neutral	Disagree	Strongly Agree	Neutral	Agree	Strongly Agree	Neutral	Agree	Neutral	Disagree	Neutral	Neutral	Strongly Agree	Agree
	2023-01-13 21:57:04	2023-01-13 22:09:30	anonymous	anonymous	M	18-25	Postgraduate	Very well	More than 1000 dinars	Agree	Agree	Agree	Agree	Neutral	Neutral	Agree	Agree	Disagree	Disagree	Strongly Agree	Disagree	Neutral	Neutral	Neutral	Neutral	Neutral	Disagree	Neutral	Agree	Disagree	Agree	Strongly Agree	Disagree	Neutral
	2023-01-13 23:29:41	2023-01-13 23:37:28	anonymous	anonymous	M	26-35	Postgraduate	Good	Less than 500 dinars	Agree	Disagree	Neutral	Agree	Agree	Neutral	Agree	Neutral	Neutral	Agree	Neutral	Agree	Agree	Agree	Agree	Neutral	Neutral	Neutral	Neutral	Neutral		Disagree	Neutral	Agree	Disagree
	2023-01-14 12:32:01	2023-01-14 12:44:59	anonymous	anonymous	F	18-25	Postgraduate	Very well	700-1000 dinars	Disagree	Neutral	Disagree	Strongly Agree	Agree	Agree	Strongly Agree	Agree	Agree	Agree	Neutral	Neutral	Disagree	Agree	Neutral	Agree	Neutral	Neutral	Neutral	Neutral	Neutral	Disagree	Neutral	Agree	Neutral
	2023-01-14 12:47:52	2023-01-14 12:59:27	anonymous	anonymous	M	18-25	BA	Acceptable	More than 1000 dinars	Strongly Disagree	Agree	Agree	Agree	Disagree	Agree	Strongly Agree	Agree	Neutral	Agree	Strongly Disagree	Disagree	Strongly Disagree	Neutral	Neutral	Neutral	Neutral	Neutral	Agree	Neutral	Disagree	Neutral	Agree	Agree	Neutral
	2023-01-14 15:39:40	2023-01-14 15:50:38	anonymous	anonymous	F	36-45	BA	Acceptable	700-1000 dinars	Neutral	Neutral	Agree	Strongly Agree	Neutral	Disagree	Agree	Neutral	Agree	Agree	Agree	Neutral	Agree	Agree	Disagree	Neutral	Agree	Neutral	Agree	Disagree	Neutral	Agree	Agree	Strongly Agree	Neutral
	2023-01-14 17:38:39	2023-01-14 17:53:10	anonymous	anonymous	F	18-25	Postgraduate	Good	700-1000 dinars	Agree	Neutral	Agree	Strongly Agree	Agree	Strongly Agree	Neutral	Neutral	Strongly Agree	Neutral	Neutral	Agree	Neutral	Agree	Agree	Strongly Agree	Disagree	Disagree	Neutral	Agree	Agree	Strongly Disagree	Strongly Agree	Neutral	Neutral
	2023-01-14 21:43:26	2023-01-14 21:55:21	anonymous	anonymous	F	18-25	BA	Very well	500-700 dinars	Disagree	Agree	Neutral	Agree	Agree	Strongly Agree	Neutral	Neutral	Strongly Agree	Strongly Disagree	Agree	Neutral	Neutral	Neutral	Agree	Disagree	Agree	Disagree	Neutral	Neutral	Strongly Agree	Neutral	Agree	Agree	Strongly Agree
	2023-01-14 21:53:18	2023-01-14 22:07:30	anonymous	anonymous	M	26-35	BA	Very well	More than 1000 dinars	Agree	Strongly Agree	Strongly Agree	Agree	Agree	Agree	Disagree	Agree	Neutral	Strongly Disagree	Agree	Neutral	Agree	Agree	Neutral	Neutral	Strongly Agree	Agree	Agree	Neutral	Agree	Neutral	Agree	Agree	Agree
	2023-01-14 23:21:56	2023-01-14 23:37:32	anonymous	anonymous	M	26-35	BA	Very well	500-700 dinars	Disagree	Agree	Neutral	Neutral	Neutral	Agree	Agree	Strongly Agree	Agree	Strongly Disagree	Neutral	Disagree	Strongly Agree	Strongly Agree	Agree	Agree	Agree	Neutral	Disagree	Neutral	Neutral	Agree	Neutral	Neutral	Neutral
	2023-01-15 03:48:17	2023-01-15 04:01:25	anonymous	anonymous	M	Over 50 years old	BA	Good	500-700 dinars	Strongly Agree	Agree	Agree	Strongly Agree	Agree	Agree	Strongly Agree	Agree	Strongly Agree	Agree	Disagree	Strongly Disagree	Agree	Neutral	Neutral	Agree	Agree	Neutral	Disagree	Disagree	Neutral	Agree	Agree	Disagree	Disagree
	2023-01-15 10:36:48	2023-01-15 10:47:53	anonymous	anonymous	M	26-35	Postgraduate	Acceptable	700-1000 dinars	Agree	Agree	Neutral	Neutral	Agree	Agree	Agree	Agree	Strongly Agree	Neutral	Agree	Agree	Neutral	Disagree	Agree	Agree	Neutral	Agree	Agree	Disagree	Agree	Neutral	Agree	Agree	Agree
	2023-01-15 10:47:29	2023-01-15 10:58:14	anonymous	anonymous	M	26-35	BA	Very well	700-1000 dinars	Agree	Neutral	Strongly Agree	Agree	Strongly Agree	Agree	Agree	Disagree	Agree	Agree	Disagree	Neutral	Agree	Neutral	Disagree	Disagree	Neutral	Agree	Agree	Disagree	Neutral	Disagree	Neutral	Agree	Agree
	2023-01-15 16:07:46	2023-01-15 16:19:24	anonymous	anonymous	F	46-50	Postgraduate	Very well	More than 1000 dinars	Neutral	Strongly Agree	Disagree	Agree	Agree	Neutral	Strongly Agree	Neutral	Agree	Neutral	Neutral	Disagree	Disagree	Agree	Neutral	Neutral	Neutral	Agree	Neutral	Agree	Neutral	Disagree	Neutral	Neutral	Agree
	2023-01-15 17:36:08	2023-01-15 17:47:20	anonymous	anonymous	F	18-25	Postgraduate	Very well	Less than 500 dinars	Disagree	Neutral	Neutral	Neutral	Agree	Agree	Agree	Agree	Disagree	Disagree	Agree	Agree	Neutral	Agree	Neutral	Neutral	Neutral	Neutral	Disagree	Neutral	Agree	Agree	Agree	Agree	Agree
	2023-01-15 18:02:34	2023-01-15 18:18:35	anonymous	anonymous	F	36-45	BA	excellent	More than 1000 dinars	Strongly Agree	Agree	Agree	Strongly Agree	Disagree	Neutral	Agree	Neutral	Agree	Agree	Neutral	Agree	Agree	Disagree	Agree	Agree	Neutral	Disagree	Agree	Neutral	Disagree	Neutral	Neutral	Neutral	Neutral
	2023-01-15 20:15:52	2023-01-15 20:26:28	anonymous	anonymous	M	26-35	BA	excellent	More than 1000 dinars	Strongly Agree	Agree	Agree	Strongly Agree	Agree	Strongly Agree	Strongly Agree	Agree	Neutral	Neutral	Neutral	Agree	Agree	Neutral	Agree	Neutral	Neutral	Neutral	Strongly Agree	Disagree	Neutral	Strongly Agree	Neutral	Neutral	Agree
	2023-01-16 16:56:42	2023-01-16 17:08:28	anonymous	anonymous	F	26-35	BA	Very well	700-1000 dinars	Disagree	Disagree	Disagree	Disagree	Strongly Disagree	Agree	Strongly Agree	Agree	Disagree	Agree	Strongly Disagree	Disagree	Agree	Neutral	Neutral	Disagree	Agree	Agree	Agree	Neutral	Neutral	Disagree	Strongly Agree	Agree	Agree
	2023-01-16 21:43:17	2023-01-16 21:56:03	anonymous	anonymous	F	18-25	Postgraduate	Very well	Less than 500 dinars	Agree	Agree	Neutral	Neutral	Agree	Neutral	Agree	Neutral	Agree	Neutral	Disagree	Neutral	Neutral	Agree	Agree	Neutral	Disagree	Agree	Agree	Neutral	Disagree	Disagree	Disagree	Agree	Agree
	2023-01-17 10:38:16	2023-01-17 10:50:56	anonymous	anonymous	M	36-45	BA	Very well	700-1000 dinars	Agree	Agree	Agree	Agree	Disagree	Agree	Agree	Neutral	Agree	Disagree	Agree	Neutral	Agree	Disagree	Disagree	Neutral	Agree	Neutral	Disagree	Strongly Disagree	Neutral	Agree	Neutral	Agree	Neutral
	2023-01-17 19:45:39	2023-01-17 19:57:03	anonymous	anonymous	F	18-25	Postgraduate	excellent	More than 1000 dinars	Disagree	Neutral	Agree	Neutral	Agree	Agree	Disagree	Disagree	Neutral	Neutral	Neutral	Agree	Disagree	Disagree	Agree	Agree	Neutral	Disagree	Agree	Neutral	Agree	Strongly Agree	Agree	Neutral	Disagree
	2023-01-17 20:23:06	2023-01-17 20:35:46	anonymous	anonymous	M	36-45	Postgraduate	Good	500-700 dinars	Disagree	Agree	Strongly Agree	Agree	Agree	Neutral	Disagree	Strongly Agree	Neutral	Neutral	Neutral	Strongly Agree	Strongly Agree	Agree	Neutral	Disagree	Agree	Agree	Disagree	Neutral	Neutral	Disagree	Agree	Neutral	Neutral
	2023-01-17 20:28:12	2023-01-17 20:40:33	anonymous	anonymous	F	46-50	BA	excellent	500-700 dinars	Agree	Agree	Agree	Agree	Agree	Agree	Neutral	Agree	Strongly Agree	Agree	Disagree	Disagree	Neutral	Agree	Neutral	Neutral	Agree	Disagree	Neutral	Disagree	Neutral	Neutral	Disagree	Agree	Agree
	2023-01-17 21:04:58	2023-01-17 21:17:19	anonymous	anonymous	F	26-35	BA	Very well	More than 1000 dinars	Disagree	Strongly Agree	Neutral	Agree	Neutral	Strongly Agree	Agree	Strongly Agree	Strongly Agree	Disagree	Strongly Disagree	Neutral	Agree	Neutral	Agree	Neutral	Disagree	Strongly Agree	Neutral	Disagree	Disagree	Neutral	Neutral	Disagree	Strongly Agree
	2023-01-18 06:12:13	2023-01-18 06:24:35	anonymous	anonymous	M	26-35	BA	Very well	700-1000 dinars	Strongly Agree	Strongly Agree	Agree	Disagree	Agree	Agree	Neutral	Neutral	Agree	Strongly Agree	Strongly Agree	Agree	Strongly Disagree	Agree	Neutral	Agree	Neutral	Neutral	Agree	Disagree	Disagree	Agree	Neutral	Neutral	Agree
	2023-01-18 10:36:24	2023-01-18 10:45:33	anonymous	anonymous	M	26-35	Postgraduate	Very well	Less than 500 dinars	Agree	Neutral	Strongly Agree	Strongly Agree	Disagree	Agree	Agree	Agree	Disagree	Agree	Agree	Disagree	Agree	Agree	Disagree	Agree	Neutral	Disagree	Strongly Agree	Agree	Neutral	Agree	Agree	Agree	Neutral
	2023-01-18 12:03:36	2023-01-18 12:17:38	anonymous	anonymous	M	36-45	BA	Very well	700-1000 dinars	Disagree	Agree	Agree	Strongly Agree	Agree	Agree	Strongly Agree	Neutral	Agree	Agree	Disagree	Neutral	Disagree	Agree	Agree	Disagree	Agree	Agree	Agree	Neutral	Neutral	Disagree	Disagree	Agree	Agree
	2023-01-18 12:20:14	2023-01-18 12:32:46	anonymous	anonymous	F	18-25	diploma	excellent	500-700 dinars	Agree	Strongly Agree	Neutral	Agree	Strongly Agree	Strongly Agree	Agree	Agree	Neutral	Strongly Disagree	Neutral	Agree	Neutral	Neutral	Neutral	Neutral	Agree	Disagree	Neutral	Neutral	Agree	Disagree	Disagree	Neutral	Neutral
	2023-01-18 14:32:56	2023-01-18 14:43:17	anonymous	anonymous	F	18-25	Postgraduate	Very well	Less than 500 dinars	Neutral	Agree	Strongly Agree	Strongly Agree	Agree	Agree	Agree	Agree	Agree	Neutral	Disagree	Strongly Disagree	Neutral	Disagree	Neutral	Agree	Neutral	Neutral	Agree	Agree	Neutral	Agree	Agree	Strongly Agree	Agree
	2023-01-18 14:40:26	2023-01-18 14:57:33	anonymous	anonymous	F	36-45	BA	excellent	More than 1000 dinars	Agree	Neutral	Neutral	Neutral	Strongly Agree	Agree	Strongly Agree	Agree	Neutral	Strongly Disagree	Agree	Neutral	Agree	Agree	Strongly Agree	Disagree	Strongly Agree	Neutral	Disagree	Neutral	Strongly Agree	Strongly Agree	Strongly Agree	Strongly Agree	Agree
	2023-01-18 17:42:17	2023-01-18 17:55:25	anonymous	anonymous	F	26-35	BA	Good	500-700 dinars	Agree	Agree	Agree	Agree	Agree	Neutral	Strongly Agree	Agree	Agree	Agree	Neutral	Agree	Agree	Neutral	Agree	Strongly Agree	Neutral	Neutral	Agree	Disagree	Disagree	Agree	Neutral	Agree	Neutral
	2023-01-18 19:26:51	2023-01-18 19:38:40	anonymous	anonymous	M	26-35	BA	Very well	Less than 500 dinars	Strongly Agree	Neutral	Neutral	Agree	Agree	Strongly Agree	Neutral	Strongly Agree	Strongly Agree	Neutral	Neutral	Agree	Neutral	Neutral	Neutral	Neutral	Agree	Neutral	Agree	Disagree	Neutral	Disagree	Neutral	Agree	Neutral
	2023-01-18 19:45:02	2023-01-18 19:56:27	anonymous	anonymous	F	36-45	Postgraduate	Very well	More than 1000 dinars	Agree	Agree	Agree	Agree	Disagree	Strongly Agree	Agree	Strongly Agree	Strongly Agree	Neutral	Disagree	Neutral	Disagree	Strongly Agree	Agree	Neutral	Disagree	Disagree	Neutral	Disagree	Agree	Strongly Agree	Agree	Agree	Agree
	2023-01-18 20:13:41	2023-01-18 20:27:53	anonymous	anonymous	M	26-35	BA	Good	700-1000 dinars	Agree	Neutral	Disagree	Agree	Neutral	Agree	Neutral	Agree	Neutral	Agree	Agree	Agree	Disagree	Disagree	Agree	Agree	Agree	Agree	Disagree	Disagree	Neutral	Agree	Strongly Agree	Disagree	Disagree
	2023-01-18 20:20:36	2023-01-18 20:33:39	anonymous	anonymous	M	18-25	Postgraduate	Very well	700-1000 dinars	Disagree	Agree	Neutral	Strongly Agree	Agree	Disagree	Neutral	Disagree	Agree	Strongly Disagree	Strongly Disagree	Disagree	Neutral	Neutral	Agree	Disagree	Neutral	Agree	Agree	Neutral	Neutral	Agree	Agree	Neutral	Disagree	The questionnaire seems very clear but idea still abvoius to us enough.
	2023-01-18 20:49:55	2023-01-18 21:01:31	anonymous	anonymous	F	26-35	Postgraduate	Acceptable	500-700 dinars	Agree	Agree	Agree	Agree	Neutral	Disagree	Agree	Agree	Agree	Strongly Agree	Neutral	Neutral	Neutral	Disagree	Disagree	Neutral	Neutral	Neutral	Neutral	Neutral	Neutral	Neutral	Neutral	Neutral	Agree
	2023-01-18 22:31:40	2023-01-18 22:44:27	anonymous	anonymous	F	26-35	Postgraduate	Very well	Less than 500 dinars	Strongly Disagree	Strongly Agree	Neutral	Neutral	Agree	Agree	Strongly Agree	Agree	Disagree	Agree	Disagree	Agree	Agree	Neutral	Neutral	Disagree	Agree	Neutral	Agree	Agree	Disagree	Neutral	Agree	Neutral	Neutral
	2023-01-18 23:03:36	2023-01-18 23:15:36	anonymous	anonymous	F	46-50	BA	Very well	Less than 500 dinars	Strongly Disagree	Neutral	Agree	Disagree	Agree	Strongly Agree	Agree	Neutral	Agree	Agree	Agree	Disagree	Strongly Agree	Agree	Strongly Disagree	Agree	Disagree	Agree	Agree	Neutral	Agree	Disagree	Disagree	Disagree	Neutral
	2023-01-19 10:23:21	2023-01-19 10:37:49	anonymous	anonymous	M	26-35	Postgraduate	excellent	500-700 dinars	Agree	Agree	Strongly Agree	Agree	Agree	Agree	Strongly Agree	Neutral	Disagree	Neutral	Agree	Strongly Disagree	Disagree	Neutral	Agree	Disagree	Neutral	Disagree	Disagree	Agree	Disagree	Neutral	Agree	Strongly Agree	Agree
	2023-01-19 10:46:32	2023-01-19 10:58:27	anonymous	anonymous	M	18-25	BA	Very well	700-1000 dinars	Neutral	Agree	Agree	Disagree	Neutral	Strongly Agree	Agree	Strongly Agree	Strongly Agree	Agree	Neutral	Neutral	Neutral	Agree	Neutral	Neutral	Strongly Agree	Neutral	Neutral	Neutral	Neutral	Disagree	Neutral	Neutral	Strongly Agree
	2023-01-19 11:45:06	2023-01-19 11:55:48	anonymous	anonymous	M	Over 50 years old	BA	Very well	500-700 dinars	Strongly Disagree	Neutral	Agree	Strongly Agree	Agree	Agree	Agree	Strongly Agree	Agree	Neutral	Agree	Agree	Agree	Agree	Neutral	Neutral	Agree	Neutral	Neutral	Strongly Disagree	Agree	Agree	Neutral	Neutral	Agree
	2023-01-19 11:51:32	2023-01-19 12:03:27	anonymous	anonymous	M	26-35	BA	excellent	500-700 dinars	Agree	Agree	Agree	Strongly Agree	Agree	Neutral	Neutral	Agree	Strongly Agree	Neutral	Agree	Agree	Neutral	Strongly Agree	Agree	Disagree	Neutral	Disagree	Agree	Strongly Disagree	Strongly Agree	Strongly Disagree	Agree	Neutral	Neutral
	2023-01-19 14:54:31	2023-01-19 15:08:43	anonymous	anonymous	F	18-25	BA	Acceptable	Less than 500 dinars	Agree	Neutral	Neutral	Agree	Disagree	Agree	Agree	Agree	Agree	Disagree	Neutral	Agree	Agree	Disagree	Neutral	Neutral	neutral	Disagree	Neutral	Neutral	Neutral	Neutral	Disagree	Agree	Agree
	2023-01-19 18:02:32	2023-01-19 18:11:40	anonymous	anonymous	M	26-35	Postgraduate	excellent	700-1000 dinars	Agree	Disagree	Neutral	Agree	Strongly Agree	Disagree	Agree	Neutral	Strongly Agree	Agree	Disagree	Neutral	Neutral	Neutral	Disagree	Agree	Agree	Agree	Disagree	Neutral	Agree	Agree	Agree	Agree	Agree
	2023-01-19 18:31:47	2023-01-19 18:43:27	anonymous	anonymous	F	18-25	BA	Very well	More than 1000 dinars	Agree	Agree	Agree	Neutral	Agree	Agree	Disagree	Strongly Agree	Strongly Agree	Disagree	Disagree	Agree	Disagree	Neutral	Agree	Agree	Agree	Agree	Neutral	Disagree	Disagree	Agree	Agree	Neutral	Neutral
	2023-01-19 21:13:44	2023-01-19 21:27:31	anonymous	anonymous	M	18-25	BA	Very well	700-1000 dinars	Neutral	Neutral	Strongly Agree	Agree	Agree	Strongly Agree	Agree	Strongly Agree	Agree	Disagree	Neutral	Strongly Agree	Disagree	Agree	Agree	Neutral	Neutral	Neutral	Disagree	Disagree	Disagree	Neutral	Agree	Neutral	Neutral
	2023-01-19 22:21:56	2023-01-19 22:33:17	anonymous	anonymous	F	36-45	Postgraduate	Very well	500-700 dinars	Agree	Agree	Agree	Neutral	Agree	Agree	Agree	Agree	Neutral	Neutral	Agree	Disagree	Agree	Neutral	Disagree	Disagree	Neutral	Disagree	Strongly Agree	Neutral	Neutral	Disagree	Agree	Agree	Neutral	I confirm and support the idea
	2023-01-20 07:32:11	2023-01-20 07:43:15	anonymous	anonymous	F	26-35	Postgraduate	Very well	700-1000 dinars	Neutral	Agree	Neutral	Neutral	Strongly Agree	Strongly Agree	Neutral	Neutral	Neutral	Neutral	Strongly Disagree	Disagree	Neutral	Strongly Disagree	Disagree	Strongly Agree	Agree	Neutral	Neutral	Disagree	Neutral	Strongly Agree	Neutral	Disagree	Strongly Agree
	2023-01-20 10:21:36	2023-01-20 10:33:40	anonymous	anonymous	M	36-45	High school or less	excellent	More than 1000 dinars	Agree	Strongly Agree	Agree	Strongly Agree	Disagree	Strongly Agree	Neutral	Agree	Agree	Neutral	Neutral	Neutral	Strongly Agree	Neutral	Strongly Disagree	Neutral	Neutral	Neutral	Agree	Neutral	Agree	Strongly Agree	Disagree	Neutral	Agree
	2023-01-20 14:44:57	2023-01-20 14:56:32	anonymous	anonymous	M	18-25	BA	Very well	Less than 500 dinars	Strongly Agree	Agree	Strongly Agree	Strongly Agree	Disagree	Agree	Agree	Strongly Agree	Disagree	Strongly Disagree	Disagree	Agree	Neutral	Agree	Agree	Agree	Neutral	Neutral	Agree	Neutral	Neutral	Disagree	Neutral	Neutral	Disagree
	2023-01-20 15:41:46	2023-01-20 15:52:16	anonymous	anonymous	F	18-25	BA	excellent	Less than 500 dinars	Neutral	Agree	Strongly Agree	Agree	Neutral	Neutral	Agree	Agree	Disagree	Disagree	Disagree	Disagree	Agree	Agree	Neutral	Agree	Disagree	Neutral	neutral	Disagree	Neutral	Disagree	Agree	Neutral	Neutral
	2023-01-20 16:20:31	2023-01-20 16:32:46	anonymous	anonymous	M	18-25	BA	Good	500-700 dinars	Neutral	Agree	Agree	Neutral	Agree	Agree	Strongly Agree	Agree	Neutral	Disagree	Neutral	Neutral	Strongly Disagree	Disagree	Strongly Disagree	Neutral	Agree	Agree	Agree	Strongly Agree	Disagree	Agree	Agree	Agree	Agree	Thanks for your efforts
	2023-01-20 18:07:16	2023-01-20 18:16:35	anonymous	anonymous	M	46-50	Postgraduate	Acceptable	Less than 500 dinars	Agree	Neutral	Neutral	Agree	Agree	Agree	Agree	Agree	Agree	Agree	Agree	Neutral	Neutral	Neutral	Neutral	Disagree	Strongly Agree	Strongly Agree	Neutral	Neutral	Agree	Neutral	Neutral	Strongly Agree	Strongly Agree
	2023-01-20 21:36:11	2023-01-20 21:48:32	anonymous	anonymous	F	26-35	Postgraduate	excellent	700-1000 dinars	Disagree	Neutral	Disagree	Neutral	Neutral	Neutral	Neutral	Strongly Agree	Strongly Agree	Neutral	Disagree	Neutral	Agree	Neutral	Agree	Agree	Neutral	Disagree	Neutral	Disagree	Disagree	Agree	Agree	Agree	Neutral
	2023-01-20 21:56:48	2023-01-20 22:07:42	anonymous	anonymous	F	18-25	Postgraduate	Very well	More than 1000 dinars	Strongly Agree	Neutral	Agree	Strongly Agree	Agree	Agree	Agree	Neutral	Strongly Agree	Strongly Disagree	Neutral	Neutral	Neutral	Agree	Neutral	Neutral	Agree	Agree	Disagree	Disagree	Strongly Agree	Neutral	Agree	Agree	Agree
	2023-01-21 08:10:43	2023-01-21 08:25:32	anonymous	anonymous	M	26-35	BA	Very well	700-1000 dinars	Neutral	Disagree	Agree	Strongly Agree	Agree	Agree	Neutral	Agree	Agree	Agree	Neutral	Agree	Neutral	Neutral	Neutral	Agree	Neutral	Neutral	Neutral	Disagree	Neutral	Agree	Neutral	Agree	Neutral
	2023-01-21 10:12:53	2023-01-21 10:24:57	anonymous	anonymous	M	26-35	BA	Very well	More than 1000 dinars	Agree	Agree	Disagree	Strongly Agree	Neutral	Neutral	Strongly Agree	Neutral	Neutral	Neutral	Strongly Disagree	Disagree	Disagree	Neutral	Strongly Disagree	Neutral	Neutral	Neutral	Agree	Agree	Neutral	Disagree	Neutral	Strongly Agree	Neutral
	2023-01-21 12:06:33	2023-01-21 12:19:34	anonymous	anonymous	F	36-45	Postgraduate	Good	Less than 500 dinars	Agree	Neutral	Neutral	Disagree	Neutral	Neutral	Strongly Agree	Disagree	Strongly Agree	Neutral	Neutral	Neutral	Agree	Agree	Disagree	Agree	Strongly Agree	Disagree	Neutral	Neutral	Neutral	Disagree	Agree	Neutral	Agree
